# Supplementary material for: Plant-based diets and incident metabolic syndrome: Results from a South Korean prospective cohort study
Source: PubMed Central journal article supplement (PMC7673569; doi:10.1371/journal.pmed.1003371), 2020-11-18
Supplement: pmed.1003371.s006.pdf [file pmed.1003371.s006.pdf]

# 식품섭취빈도조사

## Food Frequency Questionnaire

다음은 지난 1년 동안 드신 음식과 식품에 관한 질문입니다. 각 항목마다 얼마나 자주 드시는지 (지난 1년간 평균 섭취 빈도) 표시하여 주시고 드시는 음식에 대해서만 얼마만큼씩 드시는지(평균 1회 섭취 분량) 해당 칸에 표시해 주시기 바랍니다. 모든 항목에 응답을 하셔야 합니다. 거의 먹지 않는 경우는 섭취분량을 표시하지 않습니다.

The following questions concern foods and beverages consumed in the past year. For each item, please report the usual frequency and amount of consumption (per occasion). You should answer all questions. If you rarely consumed a specific food item, please do not fill in the amount.

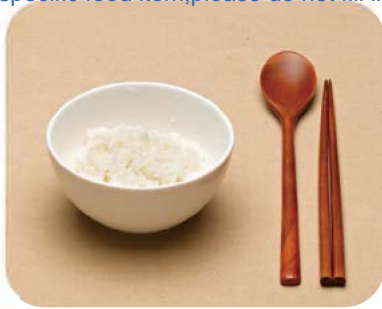

〈 사진 1-1. 밥 〉  
Photo 1-1. Rice

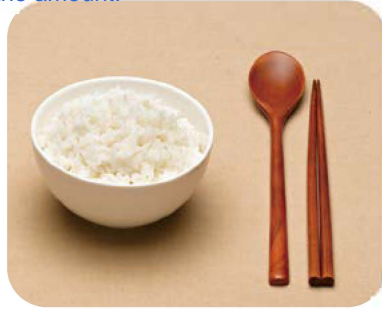

〈 사진 1-2. 밥 〉  
Photo 1-2. Rice

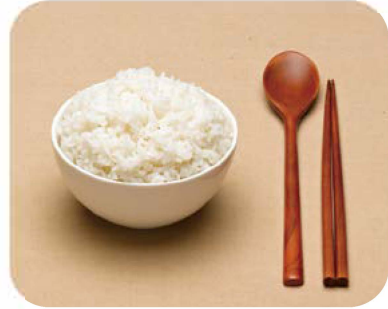

〈 사진 1-3. 밥 〉  
Photo 1-3. Rice

### Usual consumption frequency in the past year

|                                         | 지난 1년간 평균 섭취 빈도                                                                                                                                                                                                                                                                                                                                                                 |                            |                            |                            |                            |                            |                            |                            |                            | Amount consumed per occasion<br>평균 1회 섭취분량                                                                                                                                                           |  |
|-----------------------------------------|---------------------------------------------------------------------------------------------------------------------------------------------------------------------------------------------------------------------------------------------------------------------------------------------------------------------------------------------------------------------------------|----------------------------|----------------------------|----------------------------|----------------------------|----------------------------|----------------------------|----------------------------|----------------------------|------------------------------------------------------------------------------------------------------------------------------------------------------------------------------------------------------|--|
|                                         | 거의 안먹음                                                                                                                                                                                                                                                                                                                                                                          | Monthly 월                  |                            |                            | Weekly 주                   |                            |                            | Daily 일                    |                            |                                                                                                                                                                                                      |  |
|                                         |                                                                                                                                                                                                                                                                                                                                                                                 | 1회                         | 2~3회                       | 1~2회                       | 3~4회                       | 5~6회                       | 1회                         | 2회                         | 3회                         |                                                                                                                                                                                                      |  |
| Grain(Steamed) 밥                        | Rarely                                                                                                                                                                                                                                                                                                                                                                          | once                       | 2-3 times                  | 1-2 times                  | 3-4 times                  | 5-6 times                  | once                       | twice                      | 3 times                    | <input type="checkbox"/> 1 사진 1-1 (1/2공기) Photo 1-1. 1/2 bowl<br><input type="checkbox"/> 2 사진 1-2 (1공기) Photo 1-2. 1 bowl<br><input type="checkbox"/> 3 사진 1-3 (1공기 반) Photo 1-3. 1 1/2 bowl        |  |
|                                         | <input type="checkbox"/> 1                                                                                                                                                                                                                                                                                                                                                      | <input type="checkbox"/> 2 | <input type="checkbox"/> 3 | <input type="checkbox"/> 4 | <input type="checkbox"/> 5 | <input type="checkbox"/> 6 | <input type="checkbox"/> 7 | <input type="checkbox"/> 8 | <input type="checkbox"/> 9 |                                                                                                                                                                                                      |  |
|                                         | 주로 드시는 밥의 종류는? What type of grain do you usually eat?<br>① 쌀밥 ② 잡곡밥 ③ 쌀밥과 잡곡밥을 비슷하게 먹는다 White rice; mixed grain; similar amount of both<br>잡곡밥의 종류는? What type of mixed grain do you usually eat?<br>① 콩밥 ② 기타잡곡밥 grain with beans; other mixed grain<br>(집에서 잡수시는 것 뿐 아니라 회사나 식당에서 드시는 것도 포함하여 생각하십시오.)<br>Please consider foods eaten in home and foods eaten away from home. |                            |                            |                            |                            |                            |                            |                            |                            |                                                                                                                                                                                                      |  |
| Instant noodles 라면                      | <input type="checkbox"/> 1                                                                                                                                                                                                                                                                                                                                                      | <input type="checkbox"/> 2 | <input type="checkbox"/> 3 | <input type="checkbox"/> 4 | <input type="checkbox"/> 5 | <input type="checkbox"/> 6 | <input type="checkbox"/> 7 | <input type="checkbox"/> 8 | <input type="checkbox"/> 9 | <input type="checkbox"/> 1 1/2그릇 1/2 bowl<br><input type="checkbox"/> 2 1그릇 1 bowl<br><input type="checkbox"/> 3 1그릇 반 1 1/2 bowl                                                                    |  |
| Other noodles (udon noodles) 칼국수/장국수/우동 | <input type="checkbox"/> 1                                                                                                                                                                                                                                                                                                                                                      | <input type="checkbox"/> 2 | <input type="checkbox"/> 3 | <input type="checkbox"/> 4 | <input type="checkbox"/> 5 | <input type="checkbox"/> 6 | <input type="checkbox"/> 7 | <input type="checkbox"/> 8 | <input type="checkbox"/> 9 | <input type="checkbox"/> 1 1/2그릇 1/2 bowl<br><input type="checkbox"/> 2 1그릇 1 bowl<br><input type="checkbox"/> 3 1그릇 반 1 1/2 bowl                                                                    |  |
| Black bean sauce noodles 짜장면/짬뽕         | <input type="checkbox"/> 1                                                                                                                                                                                                                                                                                                                                                      | <input type="checkbox"/> 2 | <input type="checkbox"/> 3 | <input type="checkbox"/> 4 | <input type="checkbox"/> 5 | <input type="checkbox"/> 6 | <input type="checkbox"/> 7 | <input type="checkbox"/> 8 | <input type="checkbox"/> 9 | <input type="checkbox"/> 1 1/2그릇 1/2 bowl<br><input type="checkbox"/> 2 1그릇 1 bowl<br><input type="checkbox"/> 3 1그릇 반 1 1/2 bowl                                                                    |  |
| Cold noodles 냉면/메밀국수                    | <input type="checkbox"/> 1                                                                                                                                                                                                                                                                                                                                                      | <input type="checkbox"/> 2 | <input type="checkbox"/> 3 | <input type="checkbox"/> 4 | <input type="checkbox"/> 5 | <input type="checkbox"/> 6 | <input type="checkbox"/> 7 | <input type="checkbox"/> 8 | <input type="checkbox"/> 9 | <input type="checkbox"/> 1 1/2그릇 1/2 bowl<br><input type="checkbox"/> 2 1그릇 1 bowl<br><input type="checkbox"/> 3 1그릇 반 1 1/2 bowl                                                                    |  |
| Dumplings/ dumpling soup 만두/만두국         | <input type="checkbox"/> 1                                                                                                                                                                                                                                                                                                                                                      | <input type="checkbox"/> 2 | <input type="checkbox"/> 3 | <input type="checkbox"/> 4 | <input type="checkbox"/> 5 | <input type="checkbox"/> 6 | <input type="checkbox"/> 7 | <input type="checkbox"/> 8 | <input type="checkbox"/> 9 | <input type="checkbox"/> 1 냉동만두 5개/1/2그릇 5 dumplings/ 1/2 bowl<br><input type="checkbox"/> 2 냉동만두 10개/1그릇 10 dumplings/ 1 bowl<br><input type="checkbox"/> 3 냉동만두 15개/1그릇 반 15 dumplings/ 1 1/2 bowl |  |
| Rice cake/ rice cake soup 흰떡/떡국         | <input type="checkbox"/> 1                                                                                                                                                                                                                                                                                                                                                      | <input type="checkbox"/> 2 | <input type="checkbox"/> 3 | <input type="checkbox"/> 4 | <input type="checkbox"/> 5 | <input type="checkbox"/> 6 | <input type="checkbox"/> 7 | <input type="checkbox"/> 8 | <input type="checkbox"/> 9 | <input type="checkbox"/> 1 1/2그릇 1/2 bowl<br><input type="checkbox"/> 2 1그릇 1 bowl<br><input type="checkbox"/> 3 1그릇 반 1 1/2 bowl                                                                    |  |

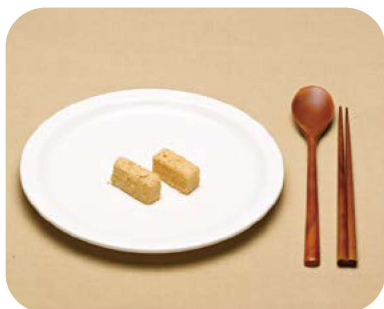

< 사진 2-1. 떡 >  
Photo 2-1, Rice cake

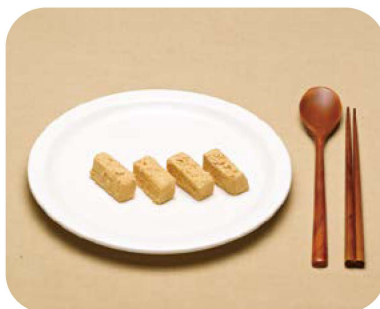

< 사진 2-2. 떡 >  
Photo 2-2, Rice cake

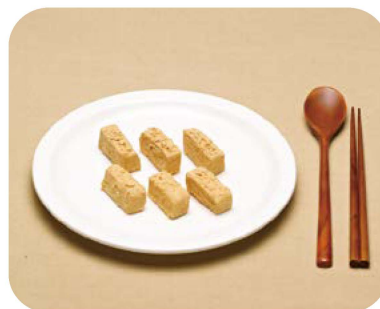

< 사진 2-3. 떡 >  
Photo 2-3, Rice cake

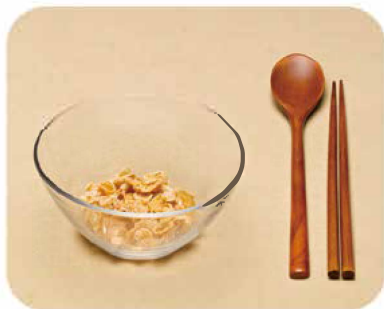

< 사진 3-1. 콘푸레이크 >  
Photo 3-1, Cereal

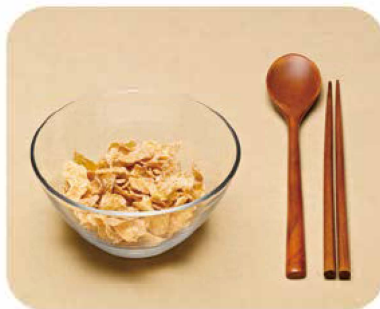

< 사진 3-2. 콘푸레이크 >  
Photo 3-2, Cereal

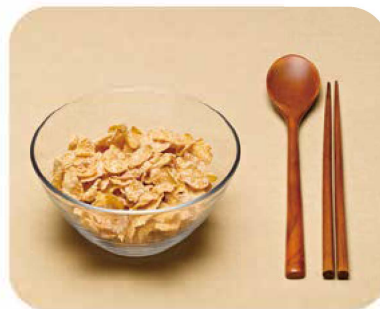

< 사진 3-3. 콘푸레이크 >  
Photo 3-3, Cereal

Usual consumption frequency in the past year

|                                                           | 지난 1년간 평균 섭취 빈도                      |                                    |                                         |                                         |                                         |                                         |                                    |                                     |                                       | Amount consumed per occasion<br>평균 1회 섭취분량                                                                                                                                                  |  |
|-----------------------------------------------------------|--------------------------------------|------------------------------------|-----------------------------------------|-----------------------------------------|-----------------------------------------|-----------------------------------------|------------------------------------|-------------------------------------|---------------------------------------|---------------------------------------------------------------------------------------------------------------------------------------------------------------------------------------------|--|
|                                                           | 거의 안먹음                               | Monthly<br>월                       |                                         |                                         | Weekly<br>주                             |                                         |                                    | Daily<br>일                          |                                       |                                                                                                                                                                                             |  |
|                                                           |                                      | 1회                                 | 2~3회                                    | 1~2회                                    | 3~4회                                    | 5~6회                                    | 1회                                 | 2회                                  | 3회                                    |                                                                                                                                                                                             |  |
| <b>Other rice cakes</b><br>떡<br>(시루떡, 백설기, 인절미 등)         | Rarely<br><input type="checkbox"/> 1 | once<br><input type="checkbox"/> 2 | 2~3 times<br><input type="checkbox"/> 3 | 1~2 times<br><input type="checkbox"/> 4 | 3~4 times<br><input type="checkbox"/> 5 | 5~6 times<br><input type="checkbox"/> 6 | once<br><input type="checkbox"/> 7 | twice<br><input type="checkbox"/> 8 | 3 times<br><input type="checkbox"/> 9 | <input type="checkbox"/> 1 사진 2-1 (2개) Photo 2-1, 2 items<br><input type="checkbox"/> 2 사진 2-2 (4개) Photo 2-2, 4 items<br><input type="checkbox"/> 3 사진 2-3 (6개) Photo 2-3, 6 items         |  |
| <b>Cereal</b><br>콘푸레이크                                    | <input type="checkbox"/> 1           | <input type="checkbox"/> 2         | <input type="checkbox"/> 3              | <input type="checkbox"/> 4              | <input type="checkbox"/> 5              | <input type="checkbox"/> 6              | <input type="checkbox"/> 7         | <input type="checkbox"/> 8          | <input type="checkbox"/> 9            | <input type="checkbox"/> 1 사진 3-1 (½그릇) Photo 3-1, 1/2 bowl<br><input type="checkbox"/> 2 사진 3-2 (한그릇) Photo 3-2, 1 bowl<br><input type="checkbox"/> 3 사진 3-3 (한그릇 반) Photo 3-3, 1 1/2 bowl |  |
| <b>White breads</b><br>식빵/ 샌드위치/ 토스트                      | <input type="checkbox"/> 1           | <input type="checkbox"/> 2         | <input type="checkbox"/> 3              | <input type="checkbox"/> 4              | <input type="checkbox"/> 5              | <input type="checkbox"/> 6              | <input type="checkbox"/> 7         | <input type="checkbox"/> 8          | <input type="checkbox"/> 9            | <input type="checkbox"/> 1 쪽 1 slice<br><input type="checkbox"/> 2 쪽 2 slices<br><input type="checkbox"/> 3 쪽 3 slices                                                                      |  |
| <b>Butter/margarine</b><br>잼/ 꿀/ 버터/ 마아가린<br>(빵에 발라먹는 경우) | <input type="checkbox"/> 1           | <input type="checkbox"/> 2         | <input type="checkbox"/> 3              | <input type="checkbox"/> 4              | <input type="checkbox"/> 5              | <input type="checkbox"/> 6              | <input type="checkbox"/> 7         | <input type="checkbox"/> 8          | <input type="checkbox"/> 9            | <input type="checkbox"/> 1 ½차술 1/2 teaspoon<br><input type="checkbox"/> 2 1차술 1 teaspoon<br><input type="checkbox"/> 3 2차술 2 teaspoon                                                       |  |
| <b>Sweet red bean bread</b><br>팥빵/ 호빵/ 풀빵                 | <input type="checkbox"/> 1           | <input type="checkbox"/> 2         | <input type="checkbox"/> 3              | <input type="checkbox"/> 4              | <input type="checkbox"/> 5              | <input type="checkbox"/> 6              | <input type="checkbox"/> 7         | <input type="checkbox"/> 8          | <input type="checkbox"/> 9            | <input type="checkbox"/> 1 ½개 1/2 item<br><input type="checkbox"/> 2 1개 1 item<br><input type="checkbox"/> 3 1개 반 1 1/2 items                                                               |  |
| <b>Other breads</b><br>기타 빵<br>(곰보빵, 도우넛, 카스테라, 크림빵)      | <input type="checkbox"/> 1           | <input type="checkbox"/> 2         | <input type="checkbox"/> 3              | <input type="checkbox"/> 4              | <input type="checkbox"/> 5              | <input type="checkbox"/> 6              | <input type="checkbox"/> 7         | <input type="checkbox"/> 8          | <input type="checkbox"/> 9            | <input type="checkbox"/> 1 ½개 1/2 item<br><input type="checkbox"/> 2 1개 1 item<br><input type="checkbox"/> 3 1개 반 1 1/2 items                                                               |  |

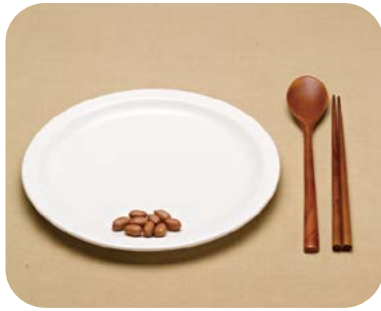

〈 사진 4-1. 땅콩 〉  
Photo 4-1, Peanuts

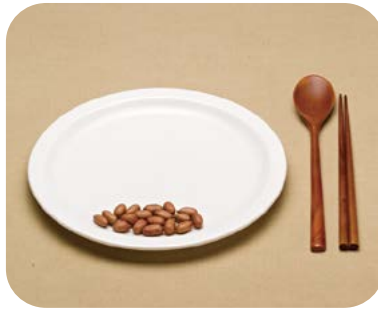

〈 사진 4-2. 땅콩 〉  
Photo 4-2, Peanuts

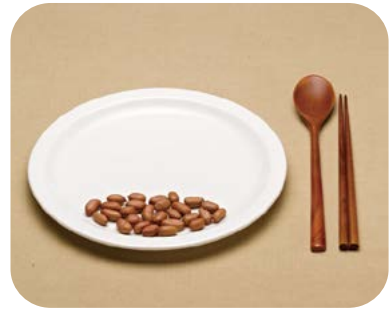

〈 사진 4-3. 땅콩 〉  
Photo 4-3, Peanuts

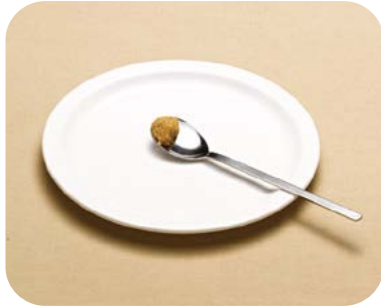

〈 사진 5-1. 된장 〉  
Photo 5-1, Bean paste

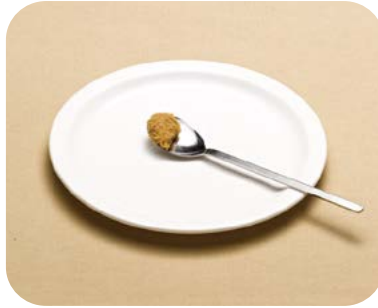

〈 사진 5-2. 된장 〉  
Photo 5-2, Bean paste

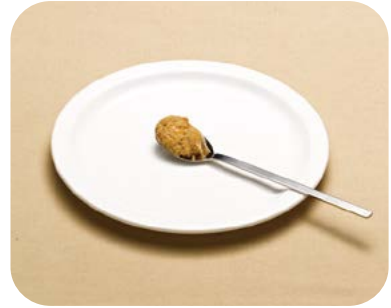

〈 사진 5-3. 된장 〉  
Photo 5-3, Bean paste

|                                                                    | 지난 1년간 평균 섭취 빈도            |                            |                            |                            |                            |                            |                            |                            |                            | 평균 1회 섭취분량                                                                                                                                                                                        |
|--------------------------------------------------------------------|----------------------------|----------------------------|----------------------------|----------------------------|----------------------------|----------------------------|----------------------------|----------------------------|----------------------------|---------------------------------------------------------------------------------------------------------------------------------------------------------------------------------------------------|
|                                                                    | 거의 안먹음                     | 월                          |                            | 주                          |                            |                            | 일                          |                            |                            |                                                                                                                                                                                                   |
|                                                                    |                            | 1회                         | 2~3회                       | 1~2회                       | 3~4회                       | 5~6회                       | 1회                         | 2회                         |                            |                                                                                                                                                                                                   |
| <b>Cake / chocolated pie</b><br>케익/초코파이                            | <input type="checkbox"/> 1 | <input type="checkbox"/> 2 | <input type="checkbox"/> 3 | <input type="checkbox"/> 4 | <input type="checkbox"/> 5 | <input type="checkbox"/> 6 | <input type="checkbox"/> 7 | <input type="checkbox"/> 8 | <input type="checkbox"/> 9 | <input type="checkbox"/> 1 ½개 1/2 item<br><input type="checkbox"/> 2 1개 1 item<br><input type="checkbox"/> 3 1개 반 1 1/2 items                                                                     |
| <b>Pizza / Hamburger</b><br>피자/햄버거                                 | <input type="checkbox"/> 1 | <input type="checkbox"/> 2 | <input type="checkbox"/> 3 | <input type="checkbox"/> 4 | <input type="checkbox"/> 5 | <input type="checkbox"/> 6 | <input type="checkbox"/> 7 | <input type="checkbox"/> 8 | <input type="checkbox"/> 9 | <input type="checkbox"/> 1 큰 것 ½개 1/2 item<br><input type="checkbox"/> 2 큰 것 1개 1 item<br><input type="checkbox"/> 3 큰 것 1개 반 1 1/2 items                                                         |
| <b>Grain powder</b><br>선식/미숫가루                                     | <input type="checkbox"/> 1 | <input type="checkbox"/> 2 | <input type="checkbox"/> 3 | <input type="checkbox"/> 4 | <input type="checkbox"/> 5 | <input type="checkbox"/> 6 | <input type="checkbox"/> 7 | <input type="checkbox"/> 8 | <input type="checkbox"/> 9 | <input type="checkbox"/> 1 2큰술 2 tablespoon<br><input type="checkbox"/> 2 3큰술/선식 1봉지 3 tablespoon / grain powder 1 bag<br><input type="checkbox"/> 3 4큰술 4 tablespoon                             |
| <b>Cookies / Crakers / Snacks</b><br>쿠키/ 크래커/ 스낵                   | <input type="checkbox"/> 1 | <input type="checkbox"/> 2 | <input type="checkbox"/> 3 | <input type="checkbox"/> 4 | <input type="checkbox"/> 5 | <input type="checkbox"/> 6 | <input type="checkbox"/> 7 | <input type="checkbox"/> 8 | <input type="checkbox"/> 9 | <input type="checkbox"/> 1 반봉지 이하 less than half bag<br><input type="checkbox"/> 2 반봉지 1/2 bag<br><input type="checkbox"/> 3 1봉지 1 bag                                                            |
| <b>Candies / Chocolates</b><br>사탕/ 초콜릿                             | <input type="checkbox"/> 1 | <input type="checkbox"/> 2 | <input type="checkbox"/> 3 | <input type="checkbox"/> 4 | <input type="checkbox"/> 5 | <input type="checkbox"/> 6 | <input type="checkbox"/> 7 | <input type="checkbox"/> 8 | <input type="checkbox"/> 9 | <input type="checkbox"/> 1 3개/반개 3 items/ 1/2 item<br><input type="checkbox"/> 2 5개/한개 5 items/ 1 item<br><input type="checkbox"/> 3 7개/한개 반 7 items/ 1 1/2 items                                 |
| <b>Peanuts / Almonds / Pine nuts</b><br>땅콩/ 아몬드/ 잣                 | <input type="checkbox"/> 1 | <input type="checkbox"/> 2 | <input type="checkbox"/> 3 | <input type="checkbox"/> 4 | <input type="checkbox"/> 5 | <input type="checkbox"/> 6 | <input type="checkbox"/> 7 | <input type="checkbox"/> 8 | <input type="checkbox"/> 9 | <input type="checkbox"/> 1 사진 4-1 (반줌) Photo 4-1, 1/2 handful<br><input type="checkbox"/> 2 사진 4-2 (한줌) Photo 4-2, 1 handful<br><input type="checkbox"/> 3 사진 4-3 (한줌 반) Photo 4-3, 1 1/2 handful |
| <b>Beans / Beans cooked in soy sauce</b><br>콩/ 콩자반<br>(초콩포함, 콩밥제외) | <input type="checkbox"/> 1 | <input type="checkbox"/> 2 | <input type="checkbox"/> 3 | <input type="checkbox"/> 4 | <input type="checkbox"/> 5 | <input type="checkbox"/> 6 | <input type="checkbox"/> 7 | <input type="checkbox"/> 8 | <input type="checkbox"/> 9 | <input type="checkbox"/> 1 사진 4-1 (½줌) Photo 4-1, 1/2 handful<br><input type="checkbox"/> 2 사진 4-2 (한줌) Photo 4-2, 1 handful<br><input type="checkbox"/> 3 사진 4-3 (한줌 반) Photo 4-3, 1 1/2 handful |
| <b>Bean paste / Bean paste soup</b><br>된장국/ 청국장/<br>된장/ 쌈장         | <input type="checkbox"/> 1 | <input type="checkbox"/> 2 | <input type="checkbox"/> 3 | <input type="checkbox"/> 4 | <input type="checkbox"/> 5 | <input type="checkbox"/> 6 | <input type="checkbox"/> 7 | <input type="checkbox"/> 8 | <input type="checkbox"/> 9 | <input type="checkbox"/> 1 사진 5-1 (½그릇) Photo 5-1, 1/2 bowl<br><input type="checkbox"/> 2 사진 5-2 (1그릇) Photo 5-2, 1 bowl<br><input type="checkbox"/> 3 사진 5-3 (1그릇 반) Photo 5-3, 1 1/2 bowl       |

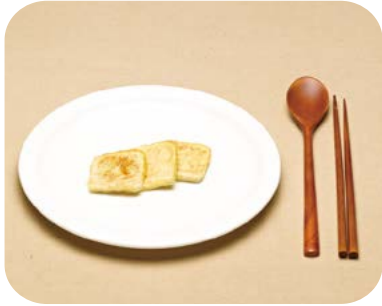

< 사진 6-1. 두부 >  
Photo 6-1, Tofu

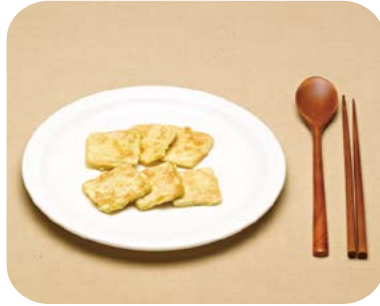

< 사진 6-2. 두부 >  
Photo 6-2, Tofu

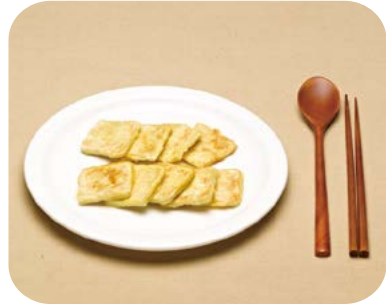

< 사진 6-3. 두부 >  
Photo 6-3, Tofu

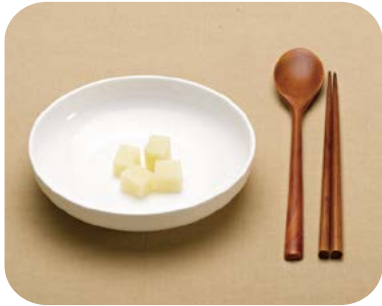

< 사진 7-1. 감자 >  
Photo 7-1, Potatoes

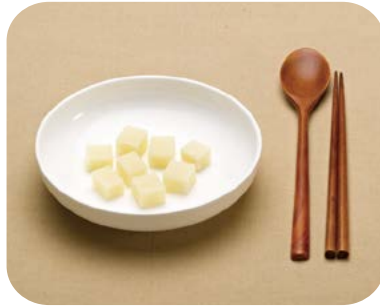

< 사진 7-3. 감자 >  
Photo 7-2, Potatoes

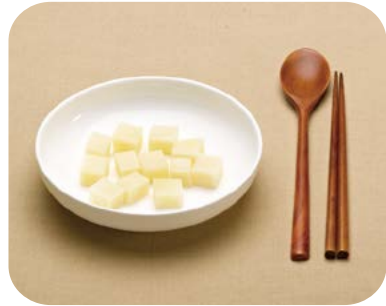

< 사진 7-3. 감자 >  
Photo 7-3, Potatoes

|                                                       | 지난 1년간 평균 섭취 빈도            |                            |                            |                            |                            |                            |                            |                            |                            | 평균 1회 섭취분량                                                                                                                                                                                                                            |
|-------------------------------------------------------|----------------------------|----------------------------|----------------------------|----------------------------|----------------------------|----------------------------|----------------------------|----------------------------|----------------------------|---------------------------------------------------------------------------------------------------------------------------------------------------------------------------------------------------------------------------------------|
|                                                       | 거의 안먹음                     | 월                          |                            | 주                          |                            |                            | 일                          |                            | 3회                         |                                                                                                                                                                                                                                       |
|                                                       |                            | 1회                         | 2~3회                       | 1~2회                       | 3~4회                       | 5~6회                       | 1회                         | 2회                         |                            |                                                                                                                                                                                                                                       |
| <b>Eggs / Quail eggs</b><br>계란/ 메추리알                  | <input type="checkbox"/> 1 | <input type="checkbox"/> 2 | <input type="checkbox"/> 3 | <input type="checkbox"/> 4 | <input type="checkbox"/> 5 | <input type="checkbox"/> 6 | <input type="checkbox"/> 7 | <input type="checkbox"/> 8 | <input type="checkbox"/> 9 | <input type="checkbox"/> 1 계란 1/2개/메추리알 3개 1/2 egg/ 3 quail eggs<br><input type="checkbox"/> 2 계란 1개/메추리알 5개 1 egg/ 5 quail eggs<br><input type="checkbox"/> 3 계란 1개 반/메추리알 8개 1 1/2 eggs/ 8 quail eggs                               |
| <b>두 부 Tofu</b><br>(순두부, 두부찌개, 된장찌개에 들어간 두부 포함)       | <input type="checkbox"/> 1 | <input type="checkbox"/> 2 | <input type="checkbox"/> 3 | <input type="checkbox"/> 4 | <input type="checkbox"/> 5 | <input type="checkbox"/> 6 | <input type="checkbox"/> 7 | <input type="checkbox"/> 8 | <input type="checkbox"/> 9 | <input type="checkbox"/> 1 사진 6-1 (3쪽) Photo 6-1, 3 slices<br><input type="checkbox"/> 2 사진 6-2 (6쪽) Photo 6-2, 6 slices<br><input type="checkbox"/> 3 사진 6-3 (9쪽) Photo 6-3, 9 slices                                                |
| <b>Starch Jelly</b><br>목                              | <input type="checkbox"/> 1 | <input type="checkbox"/> 2 | <input type="checkbox"/> 3 | <input type="checkbox"/> 4 | <input type="checkbox"/> 5 | <input type="checkbox"/> 6 | <input type="checkbox"/> 7 | <input type="checkbox"/> 8 | <input type="checkbox"/> 9 | <input type="checkbox"/> 1 사진 6-1 (3쪽) Photo 6-1, 3slices<br><input type="checkbox"/> 2 사진 6-2 (6쪽) Photo 6-2, 6 slices<br><input type="checkbox"/> 3 사진 6-3 (9쪽) Photo 6-3, 9 slices                                                 |
| <b>감 자 Potatoes</b><br>(찐감자, 감자튀김, 감자국, 감자찌개, 감자지짐 등) | <input type="checkbox"/> 1 | <input type="checkbox"/> 2 | <input type="checkbox"/> 3 | <input type="checkbox"/> 4 | <input type="checkbox"/> 5 | <input type="checkbox"/> 6 | <input type="checkbox"/> 7 | <input type="checkbox"/> 8 | <input type="checkbox"/> 9 | <input type="checkbox"/> 1 사진 7-1 (중 1/8개) Photo 7-1, medium size 1/8 item<br><input type="checkbox"/> 2 사진 7-2 (중 1/4개) Photo 7-2, medium size 1/4 item<br><input type="checkbox"/> 3 사진 7-3 (중 1/3개) Photo 7-3 medium size 1/3 item |
| <b>Sweet potatoes</b><br>고구마<br>(찐고구마, 맛탕 등)          | <input type="checkbox"/> 1 | <input type="checkbox"/> 2 | <input type="checkbox"/> 3 | <input type="checkbox"/> 4 | <input type="checkbox"/> 5 | <input type="checkbox"/> 6 | <input type="checkbox"/> 7 | <input type="checkbox"/> 8 | <input type="checkbox"/> 9 | <input type="checkbox"/> 1 중 1/2개 Medium size 1/2 item<br><input type="checkbox"/> 2 중 1개 Medium size 1 item<br><input type="checkbox"/> 3 중 1개 반 Medium size 1 1/2 items                                                             |
| <b>Stir-fried noodles and vegetables</b><br>잡채 (당면)   | <input type="checkbox"/> 1 | <input type="checkbox"/> 2 | <input type="checkbox"/> 3 | <input type="checkbox"/> 4 | <input type="checkbox"/> 5 | <input type="checkbox"/> 6 | <input type="checkbox"/> 7 | <input type="checkbox"/> 8 | <input type="checkbox"/> 9 | <input type="checkbox"/> 1 사진 10-1 (1/2접시) Photo 10-1, 1/2 plate<br><input type="checkbox"/> 2 사진 10-2 (1접시) Photo 10-2, 1 plate<br><input type="checkbox"/> 3 사진 10-3 (1접시 반) Photo 10-3 1 1/2 plates                                |

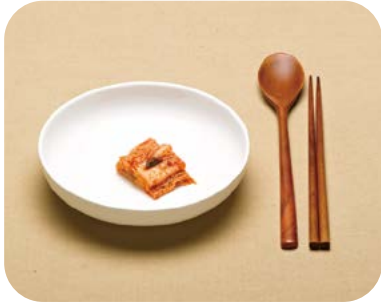

< 사진 8-1. 김치 >  
Photo 8-1, Kimchi

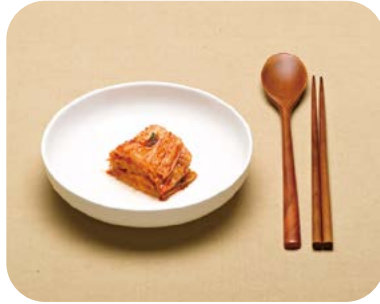

< 사진 8-2. 김치 >  
Photo 8-2, Kimchi

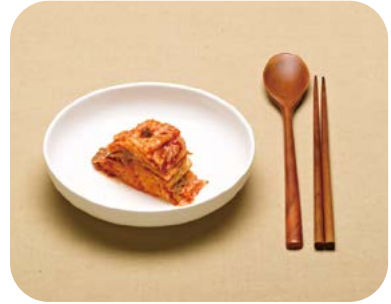

< 사진 8-3. 김치 >  
Photo 8-3, Kimchi

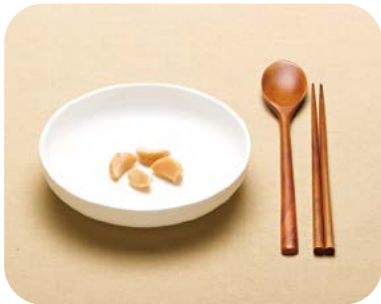

< 사진 9-1. 장아찌 >  
Photo 9-1, Pickled vegetable

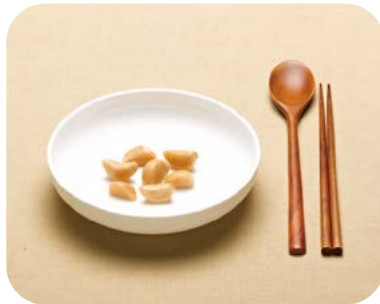

< 사진 9-2. 장아찌 >  
Photo 9-2, Pickled vegetable

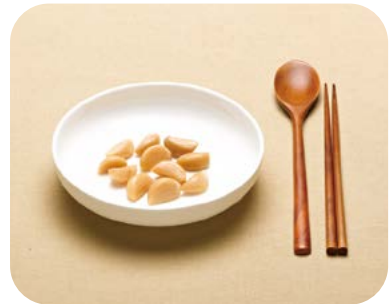

< 사진 9-3. 장아찌 >  
Photo 9-3, Pickled vegetable

|                                                                                | 지난 1년간 평균 섭취 빈도            |                            |                            |                            |                            |                            |                            |                            |                            | 평균 1회 섭취분량                                                                                                                                                                             |  |
|--------------------------------------------------------------------------------|----------------------------|----------------------------|----------------------------|----------------------------|----------------------------|----------------------------|----------------------------|----------------------------|----------------------------|----------------------------------------------------------------------------------------------------------------------------------------------------------------------------------------|--|
|                                                                                | 거의 안먹음                     | 월                          |                            |                            | 주                          |                            |                            | 일                          |                            |                                                                                                                                                                                        |  |
|                                                                                |                            | 1회                         | 2~3회                       | 1~2회                       | 3~4회                       | 5~6회                       | 1회                         | 2회                         | 3회                         |                                                                                                                                                                                        |  |
| <b>Korean cabbage kimchi</b>                                                   |                            |                            |                            |                            |                            |                            |                            |                            |                            |                                                                                                                                                                                        |  |
| 배추김치<br>(배추김치, 백김치, 김치찌개 속 배추김치 등)                                             | <input type="checkbox"/> 1 | <input type="checkbox"/> 2 | <input type="checkbox"/> 3 | <input type="checkbox"/> 4 | <input type="checkbox"/> 5 | <input type="checkbox"/> 6 | <input type="checkbox"/> 7 | <input type="checkbox"/> 8 | <input type="checkbox"/> 9 | <input type="checkbox"/> 1 사진 8-1 (3쪽) Photo 8-1, 3 slices<br><input type="checkbox"/> 2 사진 8-2 (6쪽) Photo 8-2, 6 slices<br><input type="checkbox"/> 3 사진 8-3 (9쪽) Photo 8-3, 9 slices |  |
| <b>Radish kimchi</b>                                                           |                            |                            |                            |                            |                            |                            |                            |                            |                            |                                                                                                                                                                                        |  |
| 깍두기/ 무김치                                                                       | <input type="checkbox"/> 1 | <input type="checkbox"/> 2 | <input type="checkbox"/> 3 | <input type="checkbox"/> 4 | <input type="checkbox"/> 5 | <input type="checkbox"/> 6 | <input type="checkbox"/> 7 | <input type="checkbox"/> 8 | <input type="checkbox"/> 9 | <input type="checkbox"/> 1 사진 8-1 (3개) Photo 8-1, 3 items<br><input type="checkbox"/> 2 사진 8-2 (5개) Photo 8-2, 5 items<br><input type="checkbox"/> 3 사진 8-3 (8개) Photo 8-3, 8 items    |  |
| <b>Radish</b>                                                                  |                            |                            |                            |                            |                            |                            |                            |                            |                            |                                                                                                                                                                                        |  |
| 무(국,조림)/ 단무지                                                                   | <input type="checkbox"/> 1 | <input type="checkbox"/> 2 | <input type="checkbox"/> 3 | <input type="checkbox"/> 4 | <input type="checkbox"/> 5 | <input type="checkbox"/> 6 | <input type="checkbox"/> 7 | <input type="checkbox"/> 8 | <input type="checkbox"/> 9 | <input type="checkbox"/> 1 사진 8-1 Photo 8-1<br><input type="checkbox"/> 2 사진 8-2 Photo 8-2<br><input type="checkbox"/> 3 사진 8-3 Photo 8-3                                              |  |
| <b>Other Kimchi</b>                                                            |                            |                            |                            |                            |                            |                            |                            |                            |                            |                                                                                                                                                                                        |  |
| 기타김치<br>(고들빼기, 갓김치, 파김치)                                                       | <input type="checkbox"/> 1 | <input type="checkbox"/> 2 | <input type="checkbox"/> 3 | <input type="checkbox"/> 4 | <input type="checkbox"/> 5 | <input type="checkbox"/> 6 | <input type="checkbox"/> 7 | <input type="checkbox"/> 8 | <input type="checkbox"/> 9 | <input type="checkbox"/> 1 사진 8-1 Photo 8-1<br><input type="checkbox"/> 2 사진 8-2 Photo 8-2<br><input type="checkbox"/> 3 사진 8-3 Photo 8-3                                              |  |
| <b>Pickled vegetable</b>                                                       |                            |                            |                            |                            |                            |                            |                            |                            |                            |                                                                                                                                                                                        |  |
| 장아찌<br>(마늘장아찌, 마늘쫑, 무장아찌)                                                      | <input type="checkbox"/> 1 | <input type="checkbox"/> 2 | <input type="checkbox"/> 3 | <input type="checkbox"/> 4 | <input type="checkbox"/> 5 | <input type="checkbox"/> 6 | <input type="checkbox"/> 7 | <input type="checkbox"/> 8 | <input type="checkbox"/> 9 | <input type="checkbox"/> 1 사진 9-1 Photo 9-1<br><input type="checkbox"/> 2 사진 9-2 Photo 9-2<br><input type="checkbox"/> 3 사진 9-3 Photo 9-3                                              |  |
| <b>Watery radish kimchi</b>                                                    |                            |                            |                            |                            |                            |                            |                            |                            |                            |                                                                                                                                                                                        |  |
| 나박김치/ 동치미                                                                      | <input type="checkbox"/> 1 | <input type="checkbox"/> 2 | <input type="checkbox"/> 3 | <input type="checkbox"/> 4 | <input type="checkbox"/> 5 | <input type="checkbox"/> 6 | <input type="checkbox"/> 7 | <input type="checkbox"/> 8 | <input type="checkbox"/> 9 | <input type="checkbox"/> 1 ½대접 1/2 bowl<br><input type="checkbox"/> 2 1대접 1 bowl<br><input type="checkbox"/> 3 1대접 반 1 1/2 bowl                                                        |  |
| <b>Napa cabbage / Napa cabbage soup (Korean cabbage / Korean cabbage soup)</b> |                            |                            |                            |                            |                            |                            |                            |                            |                            |                                                                                                                                                                                        |  |
| 배추/ 배추국                                                                        | <input type="checkbox"/> 1 | <input type="checkbox"/> 2 | <input type="checkbox"/> 3 | <input type="checkbox"/> 4 | <input type="checkbox"/> 5 | <input type="checkbox"/> 6 | <input type="checkbox"/> 7 | <input type="checkbox"/> 8 | <input type="checkbox"/> 9 | <input type="checkbox"/> 1 ½그릇 (½장) 1/2 bowl (1/2 piece)<br><input type="checkbox"/> 2 1그릇 (1장) 1 bowl (1 piece)<br><input type="checkbox"/> 3 1그릇 반 (1장 반) 1 1/2 bowl (1 1/2 pieces)  |  |

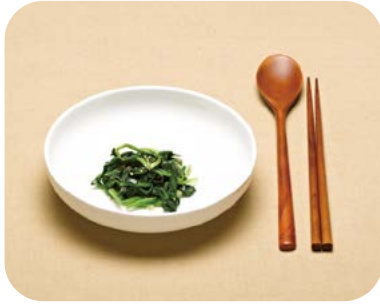

< 사진 10-1. 나물무침 >  
Photo 10-1, Seasoned vegetables

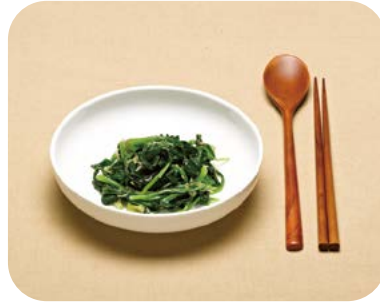

< 사진 10-2. 나물무침 >  
Photo 10-2, Seasoned vegetables

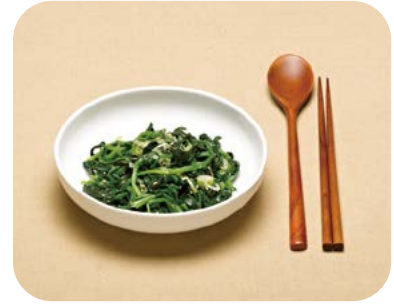

< 사진 10-3. 나물무침 >  
Photo 10-3, Seasoned vegetables

|                                                                                | 지난 1년간 평균 섭취 빈도            |                            |                            |                            |                            |                            |                            |                            |                            | 평균 1회 섭취분량                                                                                                                                      |  |
|--------------------------------------------------------------------------------|----------------------------|----------------------------|----------------------------|----------------------------|----------------------------|----------------------------|----------------------------|----------------------------|----------------------------|-------------------------------------------------------------------------------------------------------------------------------------------------|--|
|                                                                                | 거의 안먹음                     | 월                          |                            |                            | 주                          |                            |                            | 일                          |                            |                                                                                                                                                 |  |
|                                                                                |                            | 1회                         | 2~3회                       | 1~2회                       | 3~4회                       | 5~6회                       | 1회                         | 2회                         | 3회                         |                                                                                                                                                 |  |
| 시금치 Spinach<br>(시금치 나물, 국 등)                                                   | <input type="checkbox"/> 1 | <input type="checkbox"/> 2 | <input type="checkbox"/> 3 | <input type="checkbox"/> 4 | <input type="checkbox"/> 5 | <input type="checkbox"/> 6 | <input type="checkbox"/> 7 | <input type="checkbox"/> 8 | <input type="checkbox"/> 9 | <input type="checkbox"/> 1 사진 10-1 Photo 10-1<br><input type="checkbox"/> 2 사진 10-2 Photo 10-2<br><input type="checkbox"/> 3 사진 10-3 Photo 10-3 |  |
| 상추 Lettuce<br>(쌈, 무침 등)                                                        | <input type="checkbox"/> 1 | <input type="checkbox"/> 2 | <input type="checkbox"/> 3 | <input type="checkbox"/> 4 | <input type="checkbox"/> 5 | <input type="checkbox"/> 6 | <input type="checkbox"/> 7 | <input type="checkbox"/> 8 | <input type="checkbox"/> 9 | <input type="checkbox"/> 1 손바닥크기 2장 2 pieces<br><input type="checkbox"/> 2 손바닥크기 4장 4 pieces<br><input type="checkbox"/> 3 손바닥크기 6장 6 pieces    |  |
| Perilla leaves<br>들깨잎                                                          | <input type="checkbox"/> 1 | <input type="checkbox"/> 2 | <input type="checkbox"/> 3 | <input type="checkbox"/> 4 | <input type="checkbox"/> 5 | <input type="checkbox"/> 6 | <input type="checkbox"/> 7 | <input type="checkbox"/> 8 | <input type="checkbox"/> 9 | <input type="checkbox"/> 1 3장 3 pieces<br><input type="checkbox"/> 2 6장 6 pieces<br><input type="checkbox"/> 3 9장 9 pieces                      |  |
| 야채쌈/야채샐러드 Sesame leaves / Vegetables salad<br>(양배추, 양상치, 케일, 치커리, 청경채, 브로콜리 등) | <input type="checkbox"/> 1 | <input type="checkbox"/> 2 | <input type="checkbox"/> 3 | <input type="checkbox"/> 4 | <input type="checkbox"/> 5 | <input type="checkbox"/> 6 | <input type="checkbox"/> 7 | <input type="checkbox"/> 8 | <input type="checkbox"/> 9 | <input type="checkbox"/> 1 큰 것 1장 1 piece<br><input type="checkbox"/> 2 큰 것 2장 2 pieces<br><input type="checkbox"/> 3 큰 것 3장 3 pieces           |  |
| Other green vegetable<br>기타 녹색채소<br>(냉이, 근대, 아욱, 쑥, 우거지 등)                     | <input type="checkbox"/> 1 | <input type="checkbox"/> 2 | <input type="checkbox"/> 3 | <input type="checkbox"/> 4 | <input type="checkbox"/> 5 | <input type="checkbox"/> 6 | <input type="checkbox"/> 7 | <input type="checkbox"/> 8 | <input type="checkbox"/> 9 | <input type="checkbox"/> 1 사진 10-1 Photo 10-1<br><input type="checkbox"/> 2 사진 10-2 Photo 10-2<br><input type="checkbox"/> 3 사진 10-3 Photo 10-3 |  |
| Deodeok / Bellflower root<br>더덕/도라지                                            | <input type="checkbox"/> 1 | <input type="checkbox"/> 2 | <input type="checkbox"/> 3 | <input type="checkbox"/> 4 | <input type="checkbox"/> 5 | <input type="checkbox"/> 6 | <input type="checkbox"/> 7 | <input type="checkbox"/> 8 | <input type="checkbox"/> 9 | <input type="checkbox"/> 1 사진 10-1 Photo 10-1<br><input type="checkbox"/> 2 사진 10-2 Photo 10-2<br><input type="checkbox"/> 3 사진 10-3 Photo 10-3 |  |
| Bean sprouts / Mung-bean sprouts<br>콩나물/숙주나물                                   | <input type="checkbox"/> 1 | <input type="checkbox"/> 2 | <input type="checkbox"/> 3 | <input type="checkbox"/> 4 | <input type="checkbox"/> 5 | <input type="checkbox"/> 6 | <input type="checkbox"/> 7 | <input type="checkbox"/> 8 | <input type="checkbox"/> 9 | <input type="checkbox"/> 1 사진 10-1 Photo 10-1<br><input type="checkbox"/> 2 사진 10-2 Photo 10-2<br><input type="checkbox"/> 3 사진 10-3 Photo 10-3 |  |
| Bracken / Sweet potato stem / Taro stem<br>고사리/고구마줄기/토란대                       | <input type="checkbox"/> 1 | <input type="checkbox"/> 2 | <input type="checkbox"/> 3 | <input type="checkbox"/> 4 | <input type="checkbox"/> 5 | <input type="checkbox"/> 6 | <input type="checkbox"/> 7 | <input type="checkbox"/> 8 | <input type="checkbox"/> 9 | <input type="checkbox"/> 1 사진 10-1 Photo 10-1<br><input type="checkbox"/> 2 사진 10-2 Photo 10-2<br><input type="checkbox"/> 3 사진 10-3 Photo 10-3 |  |
| Oyster Mushrooms<br>느타리버섯                                                      | <input type="checkbox"/> 1 | <input type="checkbox"/> 2 | <input type="checkbox"/> 3 | <input type="checkbox"/> 4 | <input type="checkbox"/> 5 | <input type="checkbox"/> 6 | <input type="checkbox"/> 7 | <input type="checkbox"/> 8 | <input type="checkbox"/> 9 | <input type="checkbox"/> 1 사진 10-1 Photo 10-1<br><input type="checkbox"/> 2 사진 10-2 Photo 10-2<br><input type="checkbox"/> 3 사진 10-3 Photo 10-3 |  |
| Other mushrooms<br>기타버섯<br>(목이, 양송이, 팥이 등)                                     | <input type="checkbox"/> 1 | <input type="checkbox"/> 2 | <input type="checkbox"/> 3 | <input type="checkbox"/> 4 | <input type="checkbox"/> 5 | <input type="checkbox"/> 6 | <input type="checkbox"/> 7 | <input type="checkbox"/> 8 | <input type="checkbox"/> 9 | <input type="checkbox"/> 1 사진 10-1 Photo 10-1<br><input type="checkbox"/> 2 사진 10-2 Photo 10-2<br><input type="checkbox"/> 3 사진 10-3 Photo 10-3 |  |

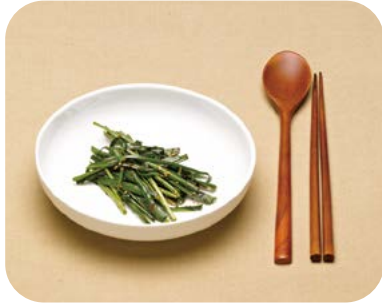

< 사진 11-1. 부추 >  
Photo 11-1, Chives

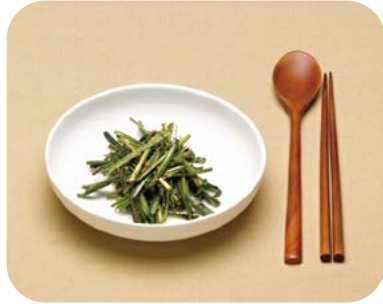

< 사진 11-2. 부추 >  
Photo 11-2, Chives

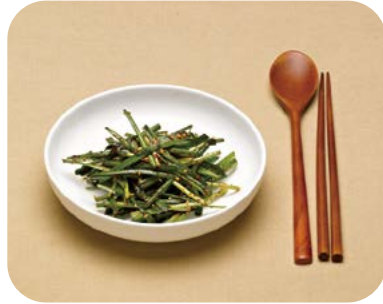

< 사진 11-3. 부추 >  
Photo 11-3, Chives

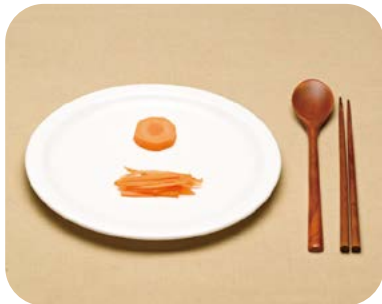

< 사진 12-1. 당근 >  
Photo 12-1, Carrot

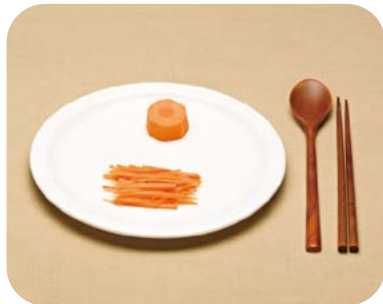

< 사진 12-2. 당근 >  
Photo 12-2 Carrot

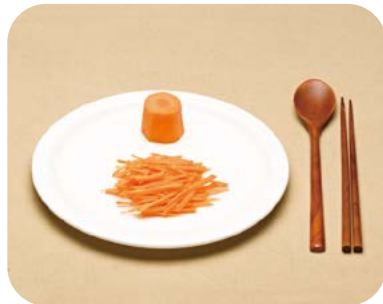

< 사진 12-3. 당근 >  
Photo 12-3 Carrot

|                                                                         | 지난 1년간 평균 섭취 빈도            |                            |                            |                            |                            |                            |                            |                            |                            | 평균 1회 섭취분량                                                                                                                                                                    |  |
|-------------------------------------------------------------------------|----------------------------|----------------------------|----------------------------|----------------------------|----------------------------|----------------------------|----------------------------|----------------------------|----------------------------|-------------------------------------------------------------------------------------------------------------------------------------------------------------------------------|--|
|                                                                         | 거의 안먹음                     | 월                          |                            |                            | 주                          |                            |                            | 일                          |                            |                                                                                                                                                                               |  |
|                                                                         |                            | 1회                         | 2~3회                       | 1~2회                       | 3~4회                       | 5~6회                       | 1회                         | 2회                         | 3회                         |                                                                                                                                                                               |  |
| Green pepper leaf / Chamnamul / Wild aster (Chwinamul)<br>고춧잎/ 참나물/ 취나물 | <input type="checkbox"/> 1 | <input type="checkbox"/> 2 | <input type="checkbox"/> 3 | <input type="checkbox"/> 4 | <input type="checkbox"/> 5 | <input type="checkbox"/> 6 | <input type="checkbox"/> 7 | <input type="checkbox"/> 8 | <input type="checkbox"/> 9 | <input type="checkbox"/> 1 사진 11-1 Photo 11-1<br><input type="checkbox"/> 2 사진 11-2 Photo 11-2<br><input type="checkbox"/> 3 사진 11-3 Photo 11-3                               |  |
| Crown daisy / Chives / Water cress<br>쑥갓/ 부추/ 미나리                       | <input type="checkbox"/> 1 | <input type="checkbox"/> 2 | <input type="checkbox"/> 3 | <input type="checkbox"/> 4 | <input type="checkbox"/> 5 | <input type="checkbox"/> 6 | <input type="checkbox"/> 7 | <input type="checkbox"/> 8 | <input type="checkbox"/> 9 | <input type="checkbox"/> 1 사진 11-1 Photo 11-1<br><input type="checkbox"/> 2 사진 11-2 Photo 11-2<br><input type="checkbox"/> 3 사진 11-3 Photo 11-3                               |  |
| Cucumber<br>오이                                                          | <input type="checkbox"/> 1 | <input type="checkbox"/> 2 | <input type="checkbox"/> 3 | <input type="checkbox"/> 4 | <input type="checkbox"/> 5 | <input type="checkbox"/> 6 | <input type="checkbox"/> 7 | <input type="checkbox"/> 8 | <input type="checkbox"/> 9 | <input type="checkbox"/> 1 사진 12-1 Photo 12-1<br><input type="checkbox"/> 2 사진 12-2 Photo 12-2<br><input type="checkbox"/> 3 사진 12-3 Photo 12-3                               |  |
| Carrot / Carrot juice<br>당근/ 당근주스                                       | <input type="checkbox"/> 1 | <input type="checkbox"/> 2 | <input type="checkbox"/> 3 | <input type="checkbox"/> 4 | <input type="checkbox"/> 5 | <input type="checkbox"/> 6 | <input type="checkbox"/> 7 | <input type="checkbox"/> 8 | <input type="checkbox"/> 9 | <input type="checkbox"/> 1 사진 12-1 Photo 12-1<br><input type="checkbox"/> 2 사진 12-2 Photo 12-2<br><input type="checkbox"/> 3 사진 12-3 Photo 12-3                               |  |
| Onion<br>양파                                                             | <input type="checkbox"/> 1 | <input type="checkbox"/> 2 | <input type="checkbox"/> 3 | <input type="checkbox"/> 4 | <input type="checkbox"/> 5 | <input type="checkbox"/> 6 | <input type="checkbox"/> 7 | <input type="checkbox"/> 8 | <input type="checkbox"/> 9 | <input type="checkbox"/> 1 사진 12-1 Photo 12-1<br><input type="checkbox"/> 2 사진 12-2 Photo 12-2<br><input type="checkbox"/> 3 사진 12-3 Photo 12-3                               |  |
| Green peppers<br>풋고추                                                    | <input type="checkbox"/> 1 | <input type="checkbox"/> 2 | <input type="checkbox"/> 3 | <input type="checkbox"/> 4 | <input type="checkbox"/> 5 | <input type="checkbox"/> 6 | <input type="checkbox"/> 7 | <input type="checkbox"/> 8 | <input type="checkbox"/> 9 | <input type="checkbox"/> 1 1개 1 item<br><input type="checkbox"/> 2 2개 2 items<br><input type="checkbox"/> 3 3개 3 items                                                        |  |
| Zucchini<br>애호박                                                         | <input type="checkbox"/> 1 | <input type="checkbox"/> 2 | <input type="checkbox"/> 3 | <input type="checkbox"/> 4 | <input type="checkbox"/> 5 | <input type="checkbox"/> 6 | <input type="checkbox"/> 7 | <input type="checkbox"/> 8 | <input type="checkbox"/> 9 | <input type="checkbox"/> 1 사진 12-1 Photo 12-1<br><input type="checkbox"/> 2 사진 12-2 Photo 12-2<br><input type="checkbox"/> 3 사진 12-3 Photo 12-3                               |  |
| Pumpkin / Kabocha squash<br>늪은호박/ 단호박/ 호박즙                              | <input type="checkbox"/> 1 | <input type="checkbox"/> 2 | <input type="checkbox"/> 3 | <input type="checkbox"/> 4 | <input type="checkbox"/> 5 | <input type="checkbox"/> 6 | <input type="checkbox"/> 7 | <input type="checkbox"/> 8 | <input type="checkbox"/> 9 | <input type="checkbox"/> 1 죽 ½그릇/ ½팩 1/2 bowl/1/2 pack<br><input type="checkbox"/> 2 죽 한그릇/1팩 1 bowl/1pack<br><input type="checkbox"/> 3 죽 한그릇 반/1팩 반 1 1/2 bowl/ 1 1/2 packs |  |

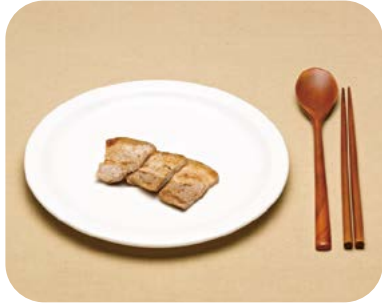

〈 사진 13-1. 고기 75그램 〉  
Photo 13-1, Pork belly 75 grams

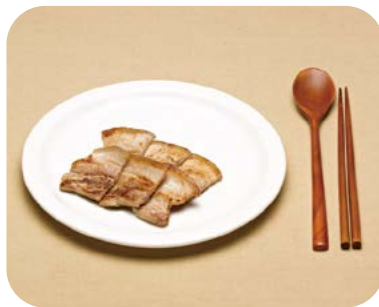

〈 사진 13-2. 고기 150그램 〉  
Photo 13-2, Pork belly 150 grams

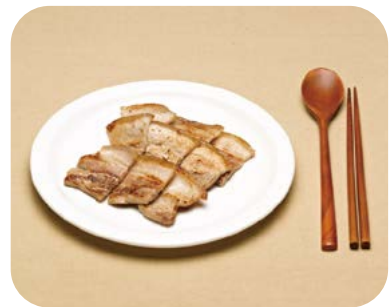

〈 사진 13-3. 고기 225그램 〉  
Photo 13-3, Pork belly 225 grams

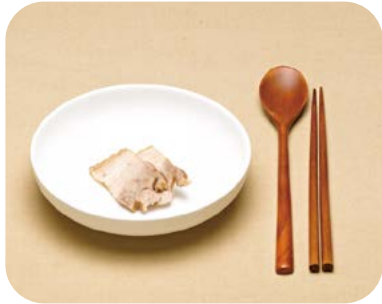

〈 사진 14-1. 돼지고기찜 25그램 〉  
Photo 14-1, Steamed pork 25 grams

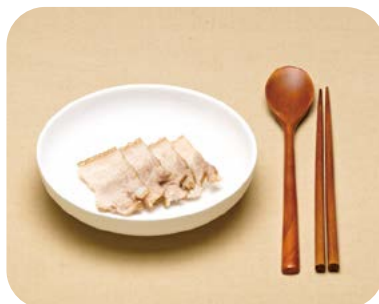

〈 사진 14-2. 돼지고기찜 50그램 〉  
Photo 14-2, Steamed pork 50 grams

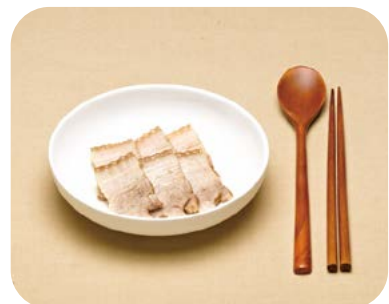

〈 사진 14-3. 돼지고기찜 75그램 〉  
Photo 14-3, Steamed pork 75 grams

|                                                                                                      | 지난 1년간 평균 섭취 빈도            |                            |                            |                            |                            |                            |                            |                            |                            | 평균 1회 섭취분량                                                                                                                                                                                                       |  |
|------------------------------------------------------------------------------------------------------|----------------------------|----------------------------|----------------------------|----------------------------|----------------------------|----------------------------|----------------------------|----------------------------|----------------------------|------------------------------------------------------------------------------------------------------------------------------------------------------------------------------------------------------------------|--|
|                                                                                                      | 거의 안먹음                     | 월                          |                            |                            | 주                          |                            |                            | 일                          |                            |                                                                                                                                                                                                                  |  |
|                                                                                                      |                            | 1회                         | 2~3회                       | 1~2회                       | 3~4회                       | 5~6회                       | 1회                         | 2회                         | 3회                         |                                                                                                                                                                                                                  |  |
| <b>Pork belly</b><br>삼겹살                                                                             | <input type="checkbox"/> 1 | <input type="checkbox"/> 2 | <input type="checkbox"/> 3 | <input type="checkbox"/> 4 | <input type="checkbox"/> 5 | <input type="checkbox"/> 6 | <input type="checkbox"/> 7 | <input type="checkbox"/> 8 | <input type="checkbox"/> 9 | <input type="checkbox"/> 1 사진 13-1 Photo 13-1<br><input type="checkbox"/> 2 사진 13-2 Photo 13-2<br><input type="checkbox"/> 3 사진 13-3 Photo 13-3                                                                  |  |
| <b>Grilled pork / Stir-fried Pork / Pork Bulgogi / Korean meatball</b><br>돼지고기구이/ 볶음/<br>돼지불고기/ 동그랑땡 | <input type="checkbox"/> 1 | <input type="checkbox"/> 2 | <input type="checkbox"/> 3 | <input type="checkbox"/> 4 | <input type="checkbox"/> 5 | <input type="checkbox"/> 6 | <input type="checkbox"/> 7 | <input type="checkbox"/> 8 | <input type="checkbox"/> 9 | <input type="checkbox"/> 1 사진 13-1 Photo 13-1<br><input type="checkbox"/> 2 사진 13-2 Photo 13-2<br><input type="checkbox"/> 3 사진 13-3 Photo 13-3                                                                  |  |
| <b>Steak / Grilled beef</b><br>스테이크/ 쇠고기구이<br>(갈비, 등심, 안심,<br>쇠고기불고기)                                | <input type="checkbox"/> 1 | <input type="checkbox"/> 2 | <input type="checkbox"/> 3 | <input type="checkbox"/> 4 | <input type="checkbox"/> 5 | <input type="checkbox"/> 6 | <input type="checkbox"/> 7 | <input type="checkbox"/> 8 | <input type="checkbox"/> 9 | <input type="checkbox"/> 1 사진 13-1 Photo 13-1<br><input type="checkbox"/> 2 사진 13-2 Photo 13-2<br><input type="checkbox"/> 3 사진 13-3 Photo 13-3                                                                  |  |
| <b>Dog meat</b><br>개고기                                                                               | <input type="checkbox"/> 1 | <input type="checkbox"/> 2 | <input type="checkbox"/> 3 | <input type="checkbox"/> 4 | <input type="checkbox"/> 5 | <input type="checkbox"/> 6 | <input type="checkbox"/> 7 | <input type="checkbox"/> 8 | <input type="checkbox"/> 9 | <input type="checkbox"/> 1 사진 13-1 Photo 13-1<br><input type="checkbox"/> 2 사진 13-2 Photo 13-2<br><input type="checkbox"/> 3 사진 13-3 Photo 13-3                                                                  |  |
| <b>Steamed pork</b><br>돼지고기 찜<br>(보쌈, 장조림, 족발)                                                       | <input type="checkbox"/> 1 | <input type="checkbox"/> 2 | <input type="checkbox"/> 3 | <input type="checkbox"/> 4 | <input type="checkbox"/> 5 | <input type="checkbox"/> 6 | <input type="checkbox"/> 7 | <input type="checkbox"/> 8 | <input type="checkbox"/> 9 | <input type="checkbox"/> 1 사진 14-1 Photo 14-1<br><input type="checkbox"/> 2 사진 14-2 Photo 14-2<br><input type="checkbox"/> 3 사진 14-3 Photo 14-3                                                                  |  |
| <b>Processed meat(ham, sausage)</b><br>가공육<br>(햄, 소시지)                                               | <input type="checkbox"/> 1 | <input type="checkbox"/> 2 | <input type="checkbox"/> 3 | <input type="checkbox"/> 4 | <input type="checkbox"/> 5 | <input type="checkbox"/> 6 | <input type="checkbox"/> 7 | <input type="checkbox"/> 8 | <input type="checkbox"/> 9 | <input type="checkbox"/> 1 비엔나햄 3개, 햄 1/2장 3 sausages/1/2 piece ham<br><input type="checkbox"/> 2 비엔나햄 5개, 햄 1장 5 sausages/1 piece ham<br><input type="checkbox"/> 3 비엔나햄 8개, 햄 1장 반 8 sausages/1 1/2 pieces ham |  |
| <b>Organ meats/Korean sausage</b><br>부산물<br>(내장육, 선지, 순대)                                            | <input type="checkbox"/> 1 | <input type="checkbox"/> 2 | <input type="checkbox"/> 3 | <input type="checkbox"/> 4 | <input type="checkbox"/> 5 | <input type="checkbox"/> 6 | <input type="checkbox"/> 7 | <input type="checkbox"/> 8 | <input type="checkbox"/> 9 | <input type="checkbox"/> 1 사진 14-1 Photo 14-1<br><input type="checkbox"/> 2 사진 14-2 Photo 14-2<br><input type="checkbox"/> 3 사진 14-3 Photo 14-3                                                                  |  |



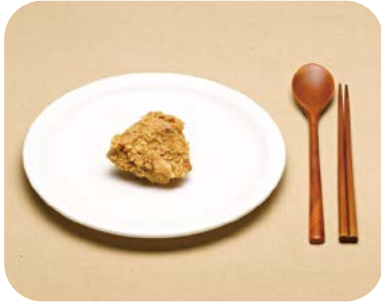

〈 사진 15-1. 닭고기 37.5그램〉  
Photo 15-1, Chicken 37.5 grams

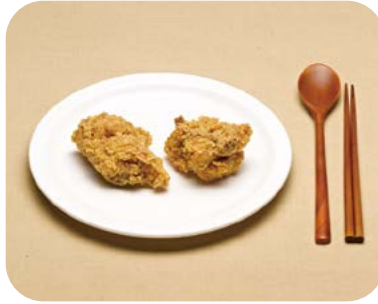

〈 사진 15-1. 닭고기 75그램〉  
Photo 15-1, Chicken 75 grams

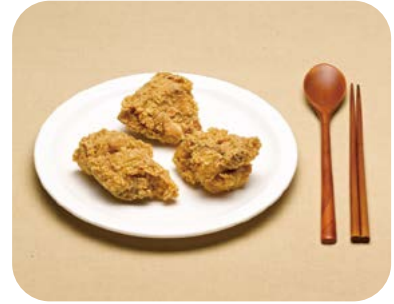

〈 사진 15-1. 닭고기 112.5그램〉  
Photo 15-1, Chicken 112.5 grams

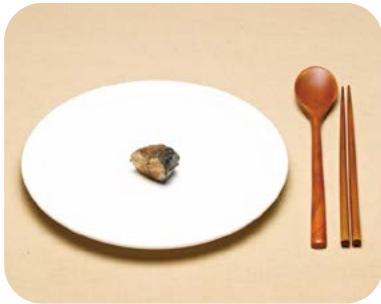

〈 사진 16-1. 생선류〉  
Photo 16-1, Fish

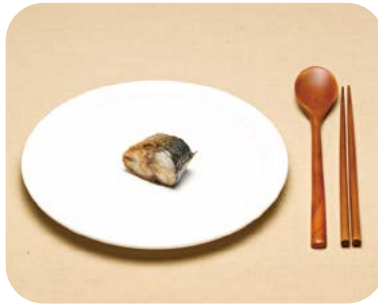

〈 사진 16-2. 생선류〉  
Photo 16-2, Fish

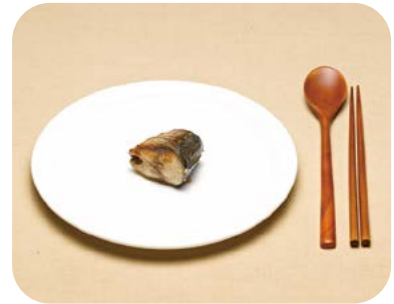

〈 사진 16-3. 생선류〉  
Photo 16-3, Fish

|                                                             | 지난 1년간 평균 섭취 빈도            |                            |                            |                            |                            |                            |                            |                            |                            | 평균 1회 섭취분량                                                                                                                                      |
|-------------------------------------------------------------|----------------------------|----------------------------|----------------------------|----------------------------|----------------------------|----------------------------|----------------------------|----------------------------|----------------------------|-------------------------------------------------------------------------------------------------------------------------------------------------|
|                                                             | 거의 안먹음                     | 월                          |                            | 주                          |                            |                            | 일                          |                            |                            |                                                                                                                                                 |
|                                                             |                            | 1회                         | 2~3회                       | 1~2회                       | 3~4회                       | 5~6회                       | 1회                         | 2회                         |                            |                                                                                                                                                 |
| <b>Fried chicken / Chicken stew / Braised Spicy Chicken</b> |                            |                            |                            |                            |                            |                            |                            |                            |                            |                                                                                                                                                 |
| 프라이드치킨/ 닭백숙/<br>삼계탕/ 닭도리탕                                   | <input type="checkbox"/> 1 | <input type="checkbox"/> 2 | <input type="checkbox"/> 3 | <input type="checkbox"/> 4 | <input type="checkbox"/> 5 | <input type="checkbox"/> 6 | <input type="checkbox"/> 7 | <input type="checkbox"/> 8 | <input type="checkbox"/> 9 | <input type="checkbox"/> 1 사진 15-1 Photo 15-1<br><input type="checkbox"/> 2 사진 15-2 Photo 15-2<br><input type="checkbox"/> 3 사진 15-3 Photo 15-3 |
| <b>탕류 Beef stew</b>                                         |                            |                            |                            |                            |                            |                            |                            |                            |                            |                                                                                                                                                 |
| (설렁탕, 곰탕, 갈비탕,<br>도가니탕 등)                                   | <input type="checkbox"/> 1 | <input type="checkbox"/> 2 | <input type="checkbox"/> 3 | <input type="checkbox"/> 4 | <input type="checkbox"/> 5 | <input type="checkbox"/> 6 | <input type="checkbox"/> 7 | <input type="checkbox"/> 8 | <input type="checkbox"/> 9 | <input type="checkbox"/> 1 반그릇 1/2 bowl<br><input type="checkbox"/> 2 한그릇 1 bowl<br><input type="checkbox"/> 3 한그릇 반 1 1/2 bowl                 |
| <b>국류 Beef soup</b>                                         |                            |                            |                            |                            |                            |                            |                            |                            |                            |                                                                                                                                                 |
| (쇠고기국, 육개장 등)                                               | <input type="checkbox"/> 1 | <input type="checkbox"/> 2 | <input type="checkbox"/> 3 | <input type="checkbox"/> 4 | <input type="checkbox"/> 5 | <input type="checkbox"/> 6 | <input type="checkbox"/> 7 | <input type="checkbox"/> 8 | <input type="checkbox"/> 9 | <input type="checkbox"/> 1 반그릇 1/2 bowl<br><input type="checkbox"/> 2 한그릇 1 bowl<br><input type="checkbox"/> 3 한그릇 반 1 1/2 bowl                 |
| <b>Sashimi</b>                                              |                            |                            |                            |                            |                            |                            |                            |                            |                            |                                                                                                                                                 |
| 생선회                                                         | <input type="checkbox"/> 1 | <input type="checkbox"/> 2 | <input type="checkbox"/> 3 | <input type="checkbox"/> 4 | <input type="checkbox"/> 5 | <input type="checkbox"/> 6 | <input type="checkbox"/> 7 | <input type="checkbox"/> 8 | <input type="checkbox"/> 9 | <input type="checkbox"/> 1 사진 16-1 Photo 16-1<br><input type="checkbox"/> 2 사진 16-2 Photo 16-2<br><input type="checkbox"/> 3 사진 16-3 Photo 16-3 |
| <b>mackerel/pacific saury</b>                               |                            |                            |                            |                            |                            |                            |                            |                            |                            |                                                                                                                                                 |
| 등푸른생선<br>(고등어, 꽁치, 삼치 등)                                    | <input type="checkbox"/> 1 | <input type="checkbox"/> 2 | <input type="checkbox"/> 3 | <input type="checkbox"/> 4 | <input type="checkbox"/> 5 | <input type="checkbox"/> 6 | <input type="checkbox"/> 7 | <input type="checkbox"/> 8 | <input type="checkbox"/> 9 | <input type="checkbox"/> 1 사진 16-1 Photo 16-1<br><input type="checkbox"/> 2 사진 16-2 Photo 16-2<br><input type="checkbox"/> 3 사진 16-3 Photo 16-3 |
| <b>Belt fish</b>                                            |                            |                            |                            |                            |                            |                            |                            |                            |                            |                                                                                                                                                 |
| 갈치                                                          | <input type="checkbox"/> 1 | <input type="checkbox"/> 2 | <input type="checkbox"/> 3 | <input type="checkbox"/> 4 | <input type="checkbox"/> 5 | <input type="checkbox"/> 6 | <input type="checkbox"/> 7 | <input type="checkbox"/> 8 | <input type="checkbox"/> 9 | <input type="checkbox"/> 1 사진 16-1 Photo 16-1<br><input type="checkbox"/> 2 사진 16-2 Photo 16-2<br><input type="checkbox"/> 3 사진 16-3 Photo 16-3 |
| <b>Eel</b>                                                  |                            |                            |                            |                            |                            |                            |                            |                            |                            |                                                                                                                                                 |
| 장어                                                          | <input type="checkbox"/> 1 | <input type="checkbox"/> 2 | <input type="checkbox"/> 3 | <input type="checkbox"/> 4 | <input type="checkbox"/> 5 | <input type="checkbox"/> 6 | <input type="checkbox"/> 7 | <input type="checkbox"/> 8 | <input type="checkbox"/> 9 | <input type="checkbox"/> 1 사진 16-1 Photo 16-1<br><input type="checkbox"/> 2 사진 16-2 Photo 16-2<br><input type="checkbox"/> 3 사진 16-3 Photo 16-3 |

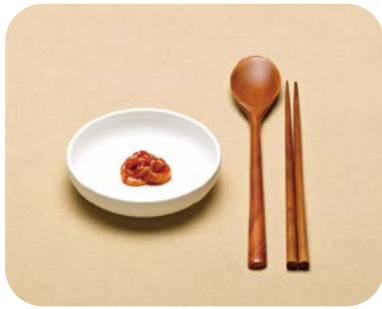

〈 사진 17-1. 젓갈 〉  
Photo 17-1, Salted fish

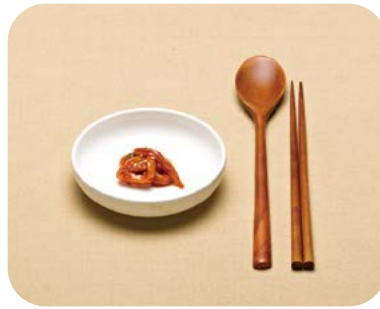

〈 사진 17-2. 젓갈 〉  
Photo 17-2, Salted fish

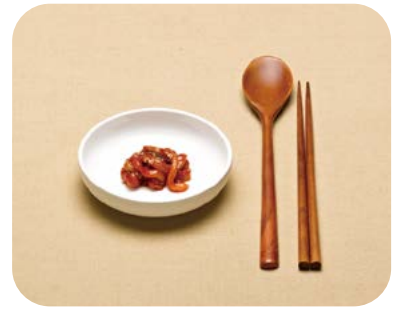

〈 사진 17-3. 젓갈 〉  
Photo 17-3, Salted fish

|                                                                   | 지난 1년간 평균 섭취 빈도            |                            |                            |                            |                            |                            |                            |                            |                            | 평균 1회 섭취분량                                                                                                                                                                                                     |
|-------------------------------------------------------------------|----------------------------|----------------------------|----------------------------|----------------------------|----------------------------|----------------------------|----------------------------|----------------------------|----------------------------|----------------------------------------------------------------------------------------------------------------------------------------------------------------------------------------------------------------|
|                                                                   | 거의 안먹음                     | 월                          |                            | 주                          |                            |                            | 일                          |                            |                            |                                                                                                                                                                                                                |
|                                                                   |                            | 1회                         | 2~3회                       | 1~2회                       | 3~4회                       | 5~6회                       | 1회                         | 2회                         |                            |                                                                                                                                                                                                                |
| Yellow croaker / Sea Bream / Sole<br>조기/ 돔/ 가자미                   | <input type="checkbox"/> 1 | <input type="checkbox"/> 2 | <input type="checkbox"/> 3 | <input type="checkbox"/> 4 | <input type="checkbox"/> 5 | <input type="checkbox"/> 6 | <input type="checkbox"/> 7 | <input type="checkbox"/> 8 | <input type="checkbox"/> 9 | <input type="checkbox"/> 1 사진 16-1 Photo 16-1<br><input type="checkbox"/> 2 사진 16-2 Photo 16-2<br><input type="checkbox"/> 3 사진 16-3 Photo 16-3                                                                |
| Alaska pollack / Frozen pollack / Dried pollack<br>명태/ 동태/ 북어     | <input type="checkbox"/> 1 | <input type="checkbox"/> 2 | <input type="checkbox"/> 3 | <input type="checkbox"/> 4 | <input type="checkbox"/> 5 | <input type="checkbox"/> 6 | <input type="checkbox"/> 7 | <input type="checkbox"/> 8 | <input type="checkbox"/> 9 | <input type="checkbox"/> 1 사진 16-1 Photo 16-1<br><input type="checkbox"/> 2 사진 16-2 Photo 16-2<br><input type="checkbox"/> 3 사진 16-3 Photo 16-3                                                                |
| Squid / Dried squid / Octopus<br>오징어/ 마른오징어/ 낙지                   | <input type="checkbox"/> 1 | <input type="checkbox"/> 2 | <input type="checkbox"/> 3 | <input type="checkbox"/> 4 | <input type="checkbox"/> 5 | <input type="checkbox"/> 6 | <input type="checkbox"/> 7 | <input type="checkbox"/> 8 | <input type="checkbox"/> 9 | <input type="checkbox"/> 1 사진 16-1 Photo 16-1<br><input type="checkbox"/> 2 사진 16-2 Photo 16-2<br><input type="checkbox"/> 3 사진 16-3 Photo 16-3                                                                |
| Anchovy / Stir-fried anchovy<br>멸치/ 멸치볶음                          | <input type="checkbox"/> 1 | <input type="checkbox"/> 2 | <input type="checkbox"/> 3 | <input type="checkbox"/> 4 | <input type="checkbox"/> 5 | <input type="checkbox"/> 6 | <input type="checkbox"/> 7 | <input type="checkbox"/> 8 | <input type="checkbox"/> 9 | <input type="checkbox"/> 1 사진 9-1(1/2큰술) Photo 9-1, 1/2 tablespoon<br><input type="checkbox"/> 2 사진 9-2(1큰술) Photo 9-2, 1 tablespoon<br><input type="checkbox"/> 3 사진 9-3(1과1/2큰술) Photo 9-3, 1 1/2 tablespoon |
| Canned tuna<br>참치(캔)                                              | <input type="checkbox"/> 1 | <input type="checkbox"/> 2 | <input type="checkbox"/> 3 | <input type="checkbox"/> 4 | <input type="checkbox"/> 5 | <input type="checkbox"/> 6 | <input type="checkbox"/> 7 | <input type="checkbox"/> 8 | <input type="checkbox"/> 9 | <input type="checkbox"/> 1 작은캔 1/2개 1/2 small can<br><input type="checkbox"/> 2 작은캔 1개 1 small can<br><input type="checkbox"/> 3 작은캔 1개 반 1 1/2 small cans                                                     |
| 젓갈 Salted shrimp/salted fish<br>(오징어젓, 창란젓, 명란젓, 새우젓, 멸치젓, 조개젓 등) | <input type="checkbox"/> 1 | <input type="checkbox"/> 2 | <input type="checkbox"/> 3 | <input type="checkbox"/> 4 | <input type="checkbox"/> 5 | <input type="checkbox"/> 6 | <input type="checkbox"/> 7 | <input type="checkbox"/> 8 | <input type="checkbox"/> 9 | <input type="checkbox"/> 1 사진 17-1 Photo 17-1<br><input type="checkbox"/> 2 사진 17-2 Photo 17-2<br><input type="checkbox"/> 3 사진 17-3 Photo 17-3                                                                |
| 조개/굴뱅이 Clam / Sea snail<br>(국, 찌개, 구이, 칼국수, 무침 등 포함)              | <input type="checkbox"/> 1 | <input type="checkbox"/> 2 | <input type="checkbox"/> 3 | <input type="checkbox"/> 4 | <input type="checkbox"/> 5 | <input type="checkbox"/> 6 | <input type="checkbox"/> 7 | <input type="checkbox"/> 8 | <input type="checkbox"/> 9 | <input type="checkbox"/> 1 사진 17-1 Photo 17-1<br><input type="checkbox"/> 2 사진 17-2 Photo 17-2<br><input type="checkbox"/> 3 사진 17-3 Photo 17-3                                                                |
| 굴 Oyster<br>(어리굴젓 포함)                                             | <input type="checkbox"/> 1 | <input type="checkbox"/> 2 | <input type="checkbox"/> 3 | <input type="checkbox"/> 4 | <input type="checkbox"/> 5 | <input type="checkbox"/> 6 | <input type="checkbox"/> 7 | <input type="checkbox"/> 8 | <input type="checkbox"/> 9 | <input type="checkbox"/> 1 2개 2 items<br><input type="checkbox"/> 2 4개 4 items<br><input type="checkbox"/> 3 6개 6 items                                                                                        |
| Crab / Marinated Crab<br>게/ 게장                                    | <input type="checkbox"/> 1 | <input type="checkbox"/> 2 | <input type="checkbox"/> 3 | <input type="checkbox"/> 4 | <input type="checkbox"/> 5 | <input type="checkbox"/> 6 | <input type="checkbox"/> 7 | <input type="checkbox"/> 8 | <input type="checkbox"/> 9 | <input type="checkbox"/> 1 중 1/4마리 medium size 1/4 item<br><input type="checkbox"/> 2 중 1/2마리 medium size 1/2 item<br><input type="checkbox"/> 3 중 1마리 medium size 1 item                                      |
| shrimp<br>새우                                                      | <input type="checkbox"/> 1 | <input type="checkbox"/> 2 | <input type="checkbox"/> 3 | <input type="checkbox"/> 4 | <input type="checkbox"/> 5 | <input type="checkbox"/> 6 | <input type="checkbox"/> 7 | <input type="checkbox"/> 8 | <input type="checkbox"/> 9 | <input type="checkbox"/> 1 중 1/2마리 medium size 1/2 item<br><input type="checkbox"/> 2 중 1마리 medium size 1 item<br><input type="checkbox"/> 3 중 2마리 medium size 2 items                                         |

Usual consumption frequency in the past year

|                               | 지난 1년간 평균 섭취 빈도            |                            |                            |                            |                            |                            |                            |                            |                            | Amount consumed per occasion<br>평균 1회 섭취분량                                                                                                                                                             |  |
|-------------------------------|----------------------------|----------------------------|----------------------------|----------------------------|----------------------------|----------------------------|----------------------------|----------------------------|----------------------------|--------------------------------------------------------------------------------------------------------------------------------------------------------------------------------------------------------|--|
|                               | 거의 안먹음<br>Rarely           | Monthly<br>월               |                            |                            | Weekly<br>주                |                            |                            | Daily<br>일                 |                            |                                                                                                                                                                                                        |  |
|                               |                            | 1회<br>once                 | 2~3회<br>2-3 times          | 1~2회<br>1-2 times          | 3~4회<br>3-4 times          | 5~6회<br>5-6 times          | 1회<br>once                 | 2회<br>twice                | 3회<br>3 times              |                                                                                                                                                                                                        |  |
| Fish cake<br>어묵/게맛살           | <input type="checkbox"/> 1 | <input type="checkbox"/> 2 | <input type="checkbox"/> 3 | <input type="checkbox"/> 4 | <input type="checkbox"/> 5 | <input type="checkbox"/> 6 | <input type="checkbox"/> 7 | <input type="checkbox"/> 8 | <input type="checkbox"/> 9 | <input type="checkbox"/> 1 1/3개 1/3 item<br><input type="checkbox"/> 2 2/3개 2/3 item<br><input type="checkbox"/> 3 1개 1 item                                                                           |  |
| Laver<br>김                    | <input type="checkbox"/> 1 | <input type="checkbox"/> 2 | <input type="checkbox"/> 3 | <input type="checkbox"/> 4 | <input type="checkbox"/> 5 | <input type="checkbox"/> 6 | <input type="checkbox"/> 7 | <input type="checkbox"/> 8 | <input type="checkbox"/> 9 | <input type="checkbox"/> 1 큰것 1/2장 (8절 4장) large size 1/2 piece<br><input type="checkbox"/> 2 큰것 한 장 (8절 8장) large size 1 piece<br><input type="checkbox"/> 3 큰것 한장 반 (8절 12장) large size 1 1/2 pieces |  |
| Kelp / Seaweed<br>다시마/ 미역     | <input type="checkbox"/> 1 | <input type="checkbox"/> 2 | <input type="checkbox"/> 3 | <input type="checkbox"/> 4 | <input type="checkbox"/> 5 | <input type="checkbox"/> 6 | <input type="checkbox"/> 7 | <input type="checkbox"/> 8 | <input type="checkbox"/> 9 | <input type="checkbox"/> 1 국 1/2그릇 1/2 bowl<br><input type="checkbox"/> 2 국 1 그릇 1 bowl<br><input type="checkbox"/> 3 국 한그릇 반 1 1/2 bowl                                                               |  |
| Milk<br>우유                    | <input type="checkbox"/> 1 | <input type="checkbox"/> 2 | <input type="checkbox"/> 3 | <input type="checkbox"/> 4 | <input type="checkbox"/> 5 | <input type="checkbox"/> 6 | <input type="checkbox"/> 7 | <input type="checkbox"/> 8 | <input type="checkbox"/> 9 | <input type="checkbox"/> 1 1/2컵 (100ml) 1/2 cup (100ml)<br><input type="checkbox"/> 2 1컵 (200ml) 1 cup (200ml)<br><input type="checkbox"/> 3 2컵 (400ml) 2 cups (400ml)                                 |  |
| Yogurt / Yoplait<br>요구르트/ 요플레 | <input type="checkbox"/> 1 | <input type="checkbox"/> 2 | <input type="checkbox"/> 3 | <input type="checkbox"/> 4 | <input type="checkbox"/> 5 | <input type="checkbox"/> 6 | <input type="checkbox"/> 7 | <input type="checkbox"/> 8 | <input type="checkbox"/> 9 | <input type="checkbox"/> 1 1/2개 1/2 item<br><input type="checkbox"/> 2 1개 1 item<br><input type="checkbox"/> 3 2개 2 items                                                                              |  |
| Ice cream<br>아이스크림            | <input type="checkbox"/> 1 | <input type="checkbox"/> 2 | <input type="checkbox"/> 3 | <input type="checkbox"/> 4 | <input type="checkbox"/> 5 | <input type="checkbox"/> 6 | <input type="checkbox"/> 7 | <input type="checkbox"/> 8 | <input type="checkbox"/> 9 | <input type="checkbox"/> 1 1/2개 1/2 item<br><input type="checkbox"/> 2 1개 1 item<br><input type="checkbox"/> 3 2개 2 items                                                                              |  |
| Cheese<br>치즈                  | <input type="checkbox"/> 1 | <input type="checkbox"/> 2 | <input type="checkbox"/> 3 | <input type="checkbox"/> 4 | <input type="checkbox"/> 5 | <input type="checkbox"/> 6 | <input type="checkbox"/> 7 | <input type="checkbox"/> 8 | <input type="checkbox"/> 9 | <input type="checkbox"/> 1 1/2장 1/2 slice<br><input type="checkbox"/> 2 1장 1 slice<br><input type="checkbox"/> 3 2장 2 slices                                                                           |  |
| Soybean milk<br>두유            | <input type="checkbox"/> 1 | <input type="checkbox"/> 2 | <input type="checkbox"/> 3 | <input type="checkbox"/> 4 | <input type="checkbox"/> 5 | <input type="checkbox"/> 6 | <input type="checkbox"/> 7 | <input type="checkbox"/> 8 | <input type="checkbox"/> 9 | <input type="checkbox"/> 1 1/2컵 (100ml) 1/2 cup (100ml)<br><input type="checkbox"/> 2 1컵 (200ml) 1 cup (200ml)<br><input type="checkbox"/> 3 2컵 (400ml) 2 cups (400ml)                                 |  |

Usual consumption frequency in the past year

|                                                                         | 지난 1년간 평균 섭취 빈도            |                            |                            |                            |                            |                            |                            |                            |                            | Amount consumed per occasion<br>평균 1회 섭취분량                                                                                                                             |  |
|-------------------------------------------------------------------------|----------------------------|----------------------------|----------------------------|----------------------------|----------------------------|----------------------------|----------------------------|----------------------------|----------------------------|------------------------------------------------------------------------------------------------------------------------------------------------------------------------|--|
|                                                                         | 거의 안먹음<br>Rarely           | Monthly<br>월               |                            |                            | Weekly<br>주                |                            |                            | Daily<br>일                 |                            |                                                                                                                                                                        |  |
|                                                                         |                            | 1회<br>once                 | 2~3회<br>2-3 times          | 1~2회<br>1-2 times          | 3~4회<br>3-4 times          | 5~6회<br>5-6 times          | 1~2회<br>1-2 times          | 3~4회<br>3-4 times          | 5~6회<br>5-6 times          |                                                                                                                                                                        |  |
| Coffe<br>커피                                                             | <input type="checkbox"/> 1 | <input type="checkbox"/> 2 | <input type="checkbox"/> 3 | <input type="checkbox"/> 4 | <input type="checkbox"/> 5 | <input type="checkbox"/> 6 | <input type="checkbox"/> 7 | <input type="checkbox"/> 8 | <input type="checkbox"/> 9 | <input type="checkbox"/> 1 1/2잔 1/2 cup<br><input type="checkbox"/> 2 1잔 1 cup<br><input type="checkbox"/> 3 2잔 2 cups                                                 |  |
| Added sugar to tea or coffee<br>차에 넣는 설탕                                | <input type="checkbox"/> 1 | <input type="checkbox"/> 2 | <input type="checkbox"/> 3 | <input type="checkbox"/> 4 | <input type="checkbox"/> 5 | <input type="checkbox"/> 6 | <input type="checkbox"/> 7 | <input type="checkbox"/> 8 | <input type="checkbox"/> 9 | <input type="checkbox"/> 1 1차술 1 teaspoon<br><input type="checkbox"/> 2 2차술 2 teaspoon<br><input type="checkbox"/> 3 3차술 3 teaspoon                                    |  |
| Added cream to tea or coffee<br>차에 넣는 크림                                | <input type="checkbox"/> 1 | <input type="checkbox"/> 2 | <input type="checkbox"/> 3 | <input type="checkbox"/> 4 | <input type="checkbox"/> 5 | <input type="checkbox"/> 6 | <input type="checkbox"/> 7 | <input type="checkbox"/> 8 | <input type="checkbox"/> 9 | <input type="checkbox"/> 1 1차술 1 teaspoon<br><input type="checkbox"/> 2 2차술 2 teaspoon<br><input type="checkbox"/> 3 3차술 3 teaspoon                                    |  |
| Green tea<br>녹차                                                         | <input type="checkbox"/> 1 | <input type="checkbox"/> 2 | <input type="checkbox"/> 3 | <input type="checkbox"/> 4 | <input type="checkbox"/> 5 | <input type="checkbox"/> 6 | <input type="checkbox"/> 7 | <input type="checkbox"/> 8 | <input type="checkbox"/> 9 | <input type="checkbox"/> 1 1/2잔 1/2 cup<br><input type="checkbox"/> 2 1잔 1 cup<br><input type="checkbox"/> 3 2잔 2 cups                                                 |  |
| 청량음료 Soft drink<br>(콜라, 사이다)                                            | <input type="checkbox"/> 1 | <input type="checkbox"/> 2 | <input type="checkbox"/> 3 | <input type="checkbox"/> 4 | <input type="checkbox"/> 5 | <input type="checkbox"/> 6 | <input type="checkbox"/> 7 | <input type="checkbox"/> 8 | <input type="checkbox"/> 9 | <input type="checkbox"/> 1 1/2컵 (100ml) 1/2 cup (100ml)<br><input type="checkbox"/> 2 1컵 (200ml) 1 cup (200ml)<br><input type="checkbox"/> 3 2컵 (400ml) 2 cups (400ml) |  |
| 기타음료 Other beverages<br>(유자차, 매실차, 알로에,<br>수정과, 인삼차, 식혜, 대추차,<br>쌍화차 등) | <input type="checkbox"/> 1 | <input type="checkbox"/> 2 | <input type="checkbox"/> 3 | <input type="checkbox"/> 4 | <input type="checkbox"/> 5 | <input type="checkbox"/> 6 | <input type="checkbox"/> 7 | <input type="checkbox"/> 8 | <input type="checkbox"/> 9 | <input type="checkbox"/> 1 1/2잔 1/2 cup<br><input type="checkbox"/> 2 1잔 1 cup<br><input type="checkbox"/> 3 2잔 2 cups                                                 |  |

For the following foods, please fill in number of months you consumed the foods, and the amount consumed per occasion during these months. If you consume only one season, then please mark 3 (3 months); two seasons, then mark 6 (6 months), three seasons, then mark 9 (9 months); four seasons, then please mark 12 (12 months)

다음에 제시하는 식품은 **섭취하는 달수를 꼭 X 표시**하시고, **섭취하는 계절동안의 섭취빈도**를 표시해 주세요.  
한 계절만 섭취하시면 ③, 두 계절 동안 섭취하시면 ⑥, 세 계절 동안 섭취하시면 ⑨, 사계절동안 섭취하시면 ⑫ 에 표시를 해 주십시오.

Usual consumption frequency during the season

|                                                                          | Number of months consumed                                                          |               | 섭취하는 계절동안의 섭취빈도 |             |                  |                  |                  |                  |             |              |                | Amount consumed per occasion<br>평균 1회 섭취분량                                                                                                                                        |
|--------------------------------------------------------------------------|------------------------------------------------------------------------------------|---------------|-----------------|-------------|------------------|------------------|------------------|------------------|-------------|--------------|----------------|-----------------------------------------------------------------------------------------------------------------------------------------------------------------------------------|
|                                                                          | 섭취<br>개월                                                                           | 거의<br>안먹<br>음 | Monthly<br>월    |             |                  | Weekly<br>주      |                  |                  | Daily<br>일  |              |                |                                                                                                                                                                                   |
|                                                                          |                                                                                    |               | 1회              | 2~3회        | 1~2회             | 3~4회             | 5~6회             | 1회               | 2회          | 3회           |                |                                                                                                                                                                                   |
| <b>Strawberry</b><br>딸기                                                  | 3 months<br>③ 3개월<br>6 months<br>⑥ 6개월<br>9 months<br>⑨ 9개월<br>12 months<br>⑫ 12개월 |               | Rarely<br>□ 1   | once<br>□ 2 | 2-3 times<br>□ 3 | 1-2 times<br>□ 4 | 3-4 times<br>□ 5 | 5-6 times<br>□ 6 | once<br>□ 7 | twice<br>□ 8 | 3 times<br>□ 9 | □ 1 중 5개 medium size 5 items<br>□ 2 중 10개 medium size 10 items<br>□ 3 중 15개 medium size 15 items                                                                                  |
| <b>Oriental melon / Melon</b><br>참외/ 메론                                  | ③ 3개월<br>⑥ 6개월<br>⑨ 9개월<br>⑫ 12개월                                                  |               | □ 1             | □ 2         | □ 3              | □ 4              | □ 5              | □ 6              | □ 7         | □ 8          | □ 9            | □ 1 중 1쪽 medium size 1 slice<br>□ 2 중 2쪽 medium size 2 slices<br>□ 3 중 4쪽 medium size 4 slices                                                                                    |
| <b>Watermelon</b><br>수박                                                  | ③ 3개월<br>⑥ 6개월<br>⑨ 9개월<br>⑫ 12개월                                                  |               | □ 1             | □ 2         | □ 3              | □ 4              | □ 5              | □ 6              | □ 7         | □ 8          | □ 9            | □ 1 중 1/2쪽 medium size 1/2 slice<br>□ 2 중 1쪽 medium size 1 slice<br>□ 3 중 2쪽 medium size 2 slices                                                                                 |
| <b>Peach / Plum</b><br>복숭아/ 자두                                           | ③ 3개월<br>⑥ 6개월<br>⑨ 9개월<br>⑫ 12개월                                                  |               | □ 1             | □ 2         | □ 3              | □ 4              | □ 5              | □ 6              | □ 7         | □ 8          | □ 9            | □ 1 중 1/4개/중 1/2개 medium size 1/4 item/ 1/2 item<br>□ 2 중 1/2개/중 1개 medium size 1/2 item/ 1 item<br>□ 3 중 1개/중 2개 medium size 1 item/ 2 items                                     |
| <b>Banana</b><br>바나나                                                     | ③ 3개월<br>⑥ 6개월<br>⑨ 9개월<br>⑫ 12개월                                                  |               | □ 1             | □ 2         | □ 3              | □ 4              | □ 5              | □ 6              | □ 7         | □ 8          | □ 9            | □ 1 중 1/2개 medium size 1/2 item<br>□ 2 중 1개 medium size 1 item<br>□ 3 중 2개 medium size 2 items                                                                                    |
| <b>Persimmon / Dried persimmon</b><br>감/ 곶감                              | ③ 3개월<br>⑥ 6개월<br>⑨ 9개월<br>⑫ 12개월                                                  |               | □ 1             | □ 2         | □ 3              | □ 4              | □ 5              | □ 6              | □ 7         | □ 8          | □ 9            | □ 1 중 1/2개 medium size 1/2 item<br>□ 2 중 1개 medium size 1 item<br>□ 3 중 2개 medium size 2 items                                                                                    |
| <b>Tangerine</b><br>귤                                                    | ③ 3개월<br>⑥ 6개월<br>⑨ 9개월<br>⑫ 12개월                                                  |               | □ 1             | □ 2         | □ 3              | □ 4              | □ 5              | □ 6              | □ 7         | □ 8          | □ 9            | □ 1 중 1/2개 medium size 1/2 item<br>□ 2 중 1개 medium size 1 item<br>□ 3 중 2개 medium size 2 items                                                                                    |
| <b>Pear / Pear juice</b><br>배/ 배즙                                        | ③ 3개월<br>⑥ 6개월<br>⑨ 9개월<br>⑫ 12개월                                                  |               | □ 1             | □ 2         | □ 3              | □ 4              | □ 5              | □ 6              | □ 7         | □ 8          | □ 9            | □ 1 중 1/4개 medium size 1/4 item<br>□ 2 중 1/3개 medium size 1/3 item<br>□ 3 중 1/2개 medium size 1/2 item                                                                             |
| <b>Apple / Apple juice</b><br>사과/<br>사과주스                                | ③ 3개월<br>⑥ 6개월<br>⑨ 9개월<br>⑫ 12개월                                                  |               | □ 1             | □ 2         | □ 3              | □ 4              | □ 5              | □ 6              | □ 7         | □ 8          | □ 9            | □ 1 1/4개/ 1/2컵 (100ml) 1/4 item/ 1/2 cup (100ml)<br>□ 2 1/2개/ 1컵 (200ml) 1/2 item/ 1 cup (200ml)<br>□ 3 1개/ 2컵 (400ml) 1 item/ 2 cups (400ml)                                     |
| <b>Orange / Orange juice</b><br>오렌지/<br>오렌지주스                            | ③ 3개월<br>⑥ 6개월<br>⑨ 9개월<br>⑫ 12개월                                                  |               | □ 1             | □ 2         | □ 3              | □ 4              | □ 5              | □ 6              | □ 7         | □ 8          | □ 9            | □ 1 중 1/2개/1/2컵 (100ml) medium size 1/2 item/ 1/2 cup (100ml)<br>□ 2 중 1개/1컵 (200ml) medium size 1 item/ 1 cup (200ml)<br>□ 3 중 2개/2컵 (400ml) medium size 2 items/ 2 cups (400ml) |
| <b>Grape / Grape juice</b><br>포도/<br>포도주스                                | ③ 3개월<br>⑥ 6개월<br>⑨ 9개월<br>⑫ 12개월                                                  |               | □ 1             | □ 2         | □ 3              | □ 4              | □ 5              | □ 6              | □ 7         | □ 8          | □ 9            | □ 1 1/4송이/1/2컵 (100ml) 1/4 item/ 1/2 cup (100ml)<br>□ 2 1/2송이/1컵 (200ml) 1/2 item/ 1 cup (200ml)<br>□ 3 1송이/2컵 (400ml) 1 item/ 2 cups (400ml)                                     |
| <b>Tomato / Cherry tomato / Tomato juice</b><br>토마토/<br>방울토마토<br>/ 토마토주스 | ③ 3개월<br>⑥ 6개월<br>⑨ 9개월<br>⑫ 12개월                                                  |               | □ 1             | □ 2         | □ 3              | □ 4              | □ 5              | □ 6              | □ 7         | □ 8          | □ 9            | □ 1 1/2개/10개/1/2컵 (100ml) 1/2 item/ 10 item/ 1/2 cup (100ml)<br>□ 2 1개/20개/1컵 (200ml) 1 item/ 20 items/ 1 cup (200ml)<br>□ 3 2개/30개/2컵 (400ml) 2 items/ 30 items/ 2 cups (400ml)  |
